# Supplementary material for: Effective chemiluminogenic systems based on acridinium esters bearing substituents of various electronic and steric properties
Source: Royal Society of Chemistry journal article supplement (doi:10.1039/c5ob01798j), 2015-10-28
Supplement: c5ob01798j1.pdf [file c5ob01798j1.pdf]

## Electronic Supplementary Information

### Effective Chemiluminogenic Systems Based on Acridinium Esters Bearing Substituents of Various Electronic and Steric Properties

Beata Zadykowicz<sup>1</sup>, Justyna Czechowska<sup>1</sup>, Agnieszka Ożóg<sup>1</sup>,  
Anton Renkevich<sup>2</sup>, Karol Krzymiński<sup>1\*</sup>

<sup>1</sup> *Faculty of Chemistry, University of Gdańsk, Wita Stwosza 63 St., 80–308 Gdańsk, Poland*

<sup>2</sup> *Department of Chemical Metrology, Kharkiv V.N. Karazin National University, Kharkiv,  
61022, Ukraine*

*\*corresponding author: karol.krzyminski@ug.edu.pl*

## Synthesis of substituted acridinium esters (XAEs)

Substituted 9-[(phenoxy)carbonyl]-10-methylacridinium triflates (XAEs, Scheme 1) were synthesized in three steps. Reflux of the solution of dehydrated acridine-9-carboxylic acid in thionyl chloride ( $C = 0.4 \text{ M}$ , 4 h) yielded 9-(chlorocarbonyl)acridinium chloride quantitatively. After evaporation of the excess of  $\text{SOCl}_2$ , the crude product was washed with dry benzene and stirred with slight excess (5–10 mol%) of appropriate phenol (distilled) in dry dichloromethane. The esterifications were carried out in dry conditions in the presence of  $\text{N,N,N}$ -triethylamine (4-fold molar excess) and catalytic amounts of  $\text{N,N}$ -(dimethyl)-4-aminopyridine (DMAP) (room temperature, 25–50 hours). After the completion, the reaction mixtures were diluted with  $\text{CH}_2\text{Cl}_2$ , filtered and applied to a gravitational LC columns (stationary phase:  $\text{SiO}_2$ , mobile phase: 2/1 v/v cyclohexane/ethyl acetate), giving chromatographically pure products (one spot on TLC plates under 254/360 nm UV lamp) – 9-[(phenoxy)carbonyl]acridines (yields of 70–90%). The analyses are listed in the following manner: retention factor ( $R_F$ ) (TLC  $\text{SiO}_2$  plate, cyclohexane/ethyl acetate = 3/2 v/v, detection: UV lamp, 254 nm/360 nm), melting point (m.p., K, *Stuart Melting Point SMP30*, Bibby Scientific Ltd., UK), elemental analysis (% calculated/found, *Eager 200 CHN*, Carlo Erba Instruments, Italy; *Vario EL Cube CHNS*, Elementar Analysensysteme GmbH, Germany). For 9-[(2-fluorophenoxy)carbonyl]acridine:  $R_F = 0.59$ ; m.p. = 436–437 K (Differential Scanning Calorimetry (DSC): 437 K<sup>32</sup>),  $C = 75.70/75.46$ ,  $H = 3.81/3.98$ ,  $N = 4.41/4.26$ ; for 9-[(2-chlorophenoxy)carbonyl]acridine:  $R_F = 0.61$ ; m.p. = 412–413 K,  $C = 71.9/70.1$ ,  $H = 3.62/3.50$ ,  $N = 4.20/4.33$ ; for 9-[(2-bromophenoxy)carbonyl]acridine:  $R_F = 0.61$ ; m.p. = 424–426 K,  $C = 63.5/62.8$ ,  $H = 3.20/3.21$ ,  $N = 3.70/3.3$ ; for 9-[(2-iodophenoxy)carbonyl]acridine: m.p. = 438–439 K (438 K<sup>32</sup>),  $R_F = 0.61$ ;  $C = 56.5/56.4$ ,  $H = 2.84/2.90$ ,  $N = 3.29/2.99$ ; for 9-[(2-trifluoromethyl)phenoxy]carbonyl}acridine: m.p. = 408.0–409.0 K,  $C = 68.7/68.6$ ,  $H = 3.29/3.37$ ,  $N = 3.81/3.77$ ; for 9-[(2-nitrophenoxy)carbonyl]acridine:  $R_F = 0.52$ , m.p. = 421.5–424 K (DSC: 422 K<sup>32</sup>),  $C = 69.7/69.7$ ,  $H = 3.51/3.46$ ,  $N = 8.14/8.10$ ; for 9-[(2-methoxyphenoxy)carbonyl]acridine:  $R_F = 0.56$ , m.p. = 459–461 K (DSC: 462 K<sup>32</sup>),  $C = 76.6/76.4$ ,  $H = 4.59/4.55$ ,  $N = 4.25/4.22$ ; for 9-[(2,6-difluorophenoxy)carbonyl]acridine:  $R_F = 0.61$ , m.p. = 467–468 K (DSC: 467 K<sup>32</sup>),  $C = 71.6/71.5$ ,  $H = 3.31/3.27$ ,  $N = 4.18/4.12$ ; for 9-[(2,6-dichlorophenoxy)carbonyl]acridine:  $R_F = 0.66$ , m.p. = 417.5–418.5 K (DSC: 418 K<sup>32</sup>),  $C = 65.2/65.5$ ,  $H = 3.01/3.20$ ,  $N = 3.80/3.68$ ; for 9-[(2,6-dibromophenoxy)carbonyl]-acridine:  $R_F = 0.67$ , m.p. = 431.5–432.5 K (DSC: 432 K<sup>32</sup>),  $C = 52.5/51.9$ ,  $H = 2.43/2.30$ ,  $N = 3.06/2.95$ ;

for 9-[(2,6-diiodophenoxy)carbonyl]acridine: m.p. = 450.5–452 K (DSC: 453 K<sup>32</sup>), C = 43.59/44.21, H = 2.01/1.86, N = 2.54/2.45; for 9-[(3-fluorophenoxy)carbonyl]acridine:  $R_F$  = 0.61, m.p. = 436–438 K, C = 75.70/75.97, H = 3.81/4.03, N = 4.41/4.27; for 9-[(4-fluorophenoxy)carbonyl]acridine:  $R_F$  = 0.61, m.p. = 472–474 K, C = 75.70/74.60, H = 3.81/3.93, N = 4.41/4.29; for 9-[(4-chlorophenoxy)carbonyl]acridine:  $R_F$  = 0.66, m.p. = 441.5–443 K, C = 71.90/70.20, H = 3.62/3.67, N = 4.20/3.96; for 9-[(4-bromophenoxy)carbonyl]acridine:  $R_F$  = 0.64; m.p. = 461–463 K, C = 63.51/62.30, H = 3.20/3.33, N = 3.70/3.27.

The above esters were subjected to N-methylation, using 5–10 molar excess of methyl trifluorometanesulphonate (CF<sub>3</sub>OSO<sub>2</sub>CH<sub>3</sub>, *Sigma-Aldrich*) in purified chloroform (Ar atmosphere, room temperature, 3–4 hours) in the presence of a catalytic amount of polymer-bound 2,6-di-*tert*-butylpyridine (*Sigma-Aldrich*). The crude products were purified by dilution the reaction mixture with small amount of acetonitrile, filtration and precipitation the salts with an excess of dry diethyl ether. XAEs were isolated by filtration, washed with ether and dried under vacuum (yields: 72–84%). Their purity, assessed with the aid of the RP-HPLC technique fall in the range of 92.0–100% (% of areas under the main signal with detection wavelength set at 254 nm and 367 nm,  $n = 3$ ). Analyses of XAEs are listed in the following manner: retention time ( $R_T$ ) (stationary phase: Waters *Symmetry* C-8 column (3×150 mm), mobile phase: acetonitrile / 0.1 M TFA = 40/60 v/v, 1 ml/min.; melting point (m.p.), elemental analysis (% calculated/found, *Carlo Erba* NCS, Italy). Analyses for **2-F** (C<sub>22</sub>H<sub>15</sub>F<sub>4</sub>NO<sub>5</sub>S):  $R_T$  = 3.72 min., m.p. = 498–500 K (dec.) (DSC: 503 K<sup>32</sup>), C = 54.9/55.3, H = 3.14/3.23, N = 2.91/2.82, S = 6.66/6.55; for **2-Cl** (C<sub>22</sub>H<sub>15</sub>ClF<sub>3</sub>NO<sub>5</sub>S):  $R_T$  = 5.38 min., m.p. = 490–491 K (dec.), C = 53.1/53.0, H = 3.04/3.12, N = 2.81/2.72, S = 6.44/6.27; for **2-Br** (C<sub>22</sub>H<sub>15</sub>BrF<sub>3</sub>NO<sub>5</sub>S):  $R_T$  = 6.12 min., m.p. = 504–505.5 K (dec.), C = 48.7/49.7, H = 2.79/2.80, N = 2.58/2.52, S = 5.91/5.72; for **2-I** (C<sub>22</sub>H<sub>15</sub>F<sub>3</sub>INO<sub>5</sub>S):  $R_T$  = 6.35 min., m.p. = 483–484 K (dec.) (DSC: 489 K<sup>32</sup>), C = 44.8/44.6, H = 2.57/2.59, N = 2.38/2.36; S = 5.44/5.34; for **2-CF<sub>3</sub>** (C<sub>23</sub>H<sub>15</sub>F<sub>6</sub>NO<sub>5</sub>S):  $R_T$  = 6.34 min., m.p. = 495.5–497 K (dec.), C = 56.0/55.8, H = 3.68/3.71, N = 2.84/2.77, S = 6.50/6.56; for **2-NO<sub>2</sub>** (C<sub>22</sub>H<sub>15</sub>F<sub>3</sub>N<sub>2</sub>O<sub>7</sub>S):  $R_T$  = 3.79 min., m.p. = 501.5–503 K (dec.) (DSC: 506, 509 K<sup>32</sup>), C = 52.0/52.9, H = 2.97/3.16, N = 5.51/5.36, S = 6.31/6.15; for **2-OCH<sub>3</sub>** (C<sub>23</sub>H<sub>18</sub>F<sub>3</sub>NO<sub>6</sub>S):  $R_T$  = 4.20 min., m.p. = 515–516 K (dec.) (DSC: 516 K<sup>32</sup>), C = 52.0/51.6, H = 2.85/2.92, N = 2.64/2.64, S = 6.06/6.06; for **2,6-diF** (C<sub>22</sub>H<sub>14</sub>F<sub>5</sub>NO<sub>5</sub>S):  $R_T$  = 4.21 min., m.p. = 516–517.5 K (dec.) (DSC: 517 K<sup>32</sup>), C = 52.9/53.0, H = 2.83/2.90, N = 2.80/2.80, S = 6.42/6.50; for **2,6-diCl**

(C<sub>22</sub>H<sub>14</sub>Cl<sub>2</sub>F<sub>3</sub>NO<sub>5</sub>S):  $R_T = 7.10$  min., m.p. = 522.5–524.5 K (dec.) (DSC: 527 K<sup>32</sup>), C = 49.6/50.5, H = 2.65/2.59, N = 2.63/2.57, S = 6.02/5.90; for **2,6-diBr** (C<sub>22</sub>H<sub>14</sub>Br<sub>2</sub>F<sub>3</sub>NO<sub>5</sub>S):  $R_T = 7.60$  min., m.p. = 519–521.5 K (dec.) (DSC: 520 K<sup>32</sup>), C = 42.5/43.4, H = 2.27/2.24, N = 2.25/2.16, S = 5.16/4.90, for **2,6-diI** (C<sub>22</sub>H<sub>14</sub>F<sub>3</sub>I<sub>2</sub>NO<sub>5</sub>S): m.p. = 463, 481 K (DSC<sup>31</sup>), C = 36.91/36.94, H = 1.95/1.97, N = 1.90/1.96, S = 4.57/4.48; for **3-F**:  $R_T = 5.53$  min., m.p. = 501–502 K (dec.); for **4-F** (C<sub>22</sub>H<sub>15</sub>F<sub>4</sub>NO<sub>5</sub>S):  $R_t = 4.58$  min., m.p. = 474–475 K (dec.), C = 54.9/55.1, H = 3.14/3.13, N = 2.91/2.90; S = 6.66/6.66; for **4-Cl** (C<sub>22</sub>H<sub>15</sub>ClF<sub>3</sub>NO<sub>5</sub>S):  $R_t = 7.28$  min., m.p. = 495.5–497.5 K (dec.), C = 53.1/53.3, H = 3.04/3.02, N = 2.81/2.70; S = 6.44/6.56; for **4-Br** (C<sub>22</sub>H<sub>15</sub>BrF<sub>3</sub>NO<sub>5</sub>S):  $R_t = 7.99$  min., m.p. = 505–506 K (dec.), C = 48.7/49.0, H = 2.79/2.77, N = 2.58/2.58, S = 5.91/5.90.

### Calculations of limits of detection and limits of quantification (*LOD*, *LOQ*)

The limits of detection (*LOD*) and limits of quantification (*LOQ*) were calculated using described procedures, assuming *t*-Student parameter  $t = 95\%$  prediction interval of the regression graphs: Area under CL profile ( $A$ ,  $RLU^2$ ) =  $f(c_{XAE} [M])$  (Figure S5, lower graph). The equations used for *LOD* and *LOQ* calculations are presented below.<sup>46</sup>

$$LOD = \frac{2 \cdot t \cdot S_{yx}}{a} \cdot \sqrt{1 + \frac{1}{n} + \frac{(b + y_c - \bar{y})^2}{a^2 \cdot Q_{xx}}} \quad (\text{eq. S1})$$

where:  $y_c = t \cdot S_{yx} \cdot \sqrt{1 + \frac{1}{n} + \frac{\bar{x}^2}{Q_{xx}}}$

$$LOQ = \frac{y_h - b + t \cdot S_{yx}}{a} \cdot \sqrt{1 + \frac{1}{n} + \frac{(b + y_h - \bar{y})^2}{a^2 \cdot Q_{xx}}} \quad (\text{eq. S2})$$

where:  $y_h = b + 2 \cdot t \cdot S_{yx} \cdot \sqrt{1 + \frac{1}{n} + \frac{(y_c/a - \bar{x})^2}{Q_{xx}}}$

$\bar{x}$  – denotes the average value of the variable  $x$  ( $\bar{x} = \frac{\sum x_i}{n}$ );  $\bar{y}$  – the average value of the variable  $y$  ( $\bar{y} = \frac{\sum y_i}{n}$ );  $Q_{xx}$  – the sum of the squares  $Q_{xx} = \sum (x_i - \bar{x})^2$ ;  $S_{yx}$  – standard error of estimate of  $y$  on  $x$ , residual standard deviation:

$$S_{yx} = \sqrt{\frac{\sum (y_i - y_{t_i})^2}{n - 2}} = \sqrt{\frac{\sum y_i^2 - b \sum y_i - a \sum x_i y_i}{n - 2}} \quad (\text{eq. S3})$$

**Table S1**  $^1\text{H}$  NMR (room temperature) and MALDI-TOF MS data for 9-[(phenoxy)carbonyl]-10-methylacridinium triflates (XAEs) substituted in the benzene ring. Structures, names and codes of the compounds with the numbering of atoms are given in Scheme 1.

| compound<br>code<br>(Scheme 1)      | $^1\text{H}$ NMR*     |                     |                                 |                                 |                            |                            |                       |                            |                            |            | Main cations detected*** (MALDI-TOF MS) |                                                |                        |
|-------------------------------------|-----------------------|---------------------|---------------------------------|---------------------------------|----------------------------|----------------------------|-----------------------|----------------------------|----------------------------|------------|-----------------------------------------|------------------------------------------------|------------------------|
|                                     | H1/H8                 | H2/H7               | H3/H6                           | H4/H5                           | H19                        | H20                        | H21                   | H22                        | H23                        | H24        | $\text{M}^+$ ,<br>$(\text{M} \pm 1)^+$  | $\text{MeAcr}^+$ ,<br>$(\text{MeAcr} \pm 1)^+$ | Others                 |
| <b>2-F</b><br>CD3OD                 | 8.96 (9.3)<br>d, 2H   | 8.21 (7.8)<br>t, 2H | 8.55 (8.8)<br>m, 2H             | 8.57 (9.3)<br>m, 2H             |                            | 7.96 (7.8)<br>t, 1H        | 7.49 (7.6)<br>t, 1H   | 7.56 (5.6)<br>m, 1H        | 7.64 (10)<br>t, 1H         | 4.96 s, 3H | 332 (100),<br>333 (33)                  | 193 (79)                                       | 164 (11)               |
| <b>2-Cl</b><br>CD3OD                | 8.96 (9.3)<br>d, 2H   | 8.22 (7.8)<br>t, 2H | 8.56 (7.8)<br>t, 2H             | 8.67 (8.8)<br>d, 2H             |                            | 8.07 (7.8)<br>d, 1H        | 7.55 (7.6)<br>t, 1H   | 7.66 (7.6)<br>t, 1H        | 7.81 (7.8)<br>d, 1H        | 4.96 s, 3H | 348 (100),<br>349 (75)                  | 193 (40)                                       | 269 (11)               |
| <b>2-Br</b><br>DMSO-d6              | 8.96 (9.3)<br>d, 2H   | 8.22 (7.3)<br>t, 2H | 8.57 (8.3)<br>t, 2H             | 8.72 (8.8)<br>d, 2H             |                            | 8.08 (8.3)<br>d, 1H        | 7.47 (7.6)<br>t, 1H   | 7.69 (7.6)<br>t, 1H        | 7.94 (7.8)<br>d, 1H        | 4.96 s, 3H | 394 (100),<br>393 (75)                  | 193 (96)                                       | 139 (27),<br>165 (24)  |
| <b>2-I</b><br>DMSO-d6               | 8.98 (9.3)<br>d, 2H   | 8.21 (7.8)<br>t, 2H | 8.59 (8.0)<br>t, 2H             | 8.79 (8.3)<br>d, 2H             |                            | 8.10 (7.1)<br>d, 1H        | 7.30 (7.6)<br>t, 1H   | 7.70 (7.8)<br>t, 1H        | 8.07 (7.8)<br>d, 1H        | 4.98 s, 3H | 440 (100),<br>441 (39)                  | 193 (44)                                       | 284 (14)               |
| <b>2-CF<sub>3</sub></b><br>DMSO-d6  | 8.99 (9.3)<br>d, 2H   | 8.21 (7.6)<br>t, 2H | 8.58 (6.8)<br>m, 4H<br>(+H4/H5) | 8.58 (6.8)<br>m, 4H<br>(+H3/H6) |                            | 8.37 (7.8)<br>d, 2H        | 7.73 (7.3)<br>t, 1H   | 8.01 (7.8)<br>d, 1H        | 8.05 (7.3)<br>d, 1H        | 4.98 s, 3H | 382 (36),<br>383 (41)                   | 193 (44),<br>194 (100)                         | 415 (57),<br>532 (41)  |
| <b>2-NO<sub>2</sub></b><br>DMSO-d6  | 8.97 (9.6)<br>d, 2H   | 8.24 (9.0)<br>t, 2H | 8.57 (7.9)<br>sxt, 2H           | 8.68 (8.4)<br>d, 2H             |                            | 8.35 (8.2, 1.6)<br>q, 1H   | 8.07 (7.9)<br>sxt, 1H | 7.78 (7.9)<br>t, 1H        | 8.20 (6.8)<br>d, 1H        | 4.99 s, 3H | 359 (13),<br>358 (18)                   | 193 (100)                                      | 238 (28),<br>509 (4)   |
| <b>2-OCH<sub>3</sub></b><br>DMSO-d6 | 8.94 (9.2)<br>d, 2H   | 8.23 (7.6)<br>t, 2H | 8.56 (7.9)<br>m, 2H             | 8.67 (8.0)<br>d, 2H             |                            | 7.39 (7.4)<br>q, 1H        | 7.17 (7.6)<br>sxt, 1H | 7.47 (7.8)<br>m, 1H        | 7.70 (8.0)<br>q, 1H        | 4.96 s, 3H | 344 (63),<br>345 (8)                    | 193 (100),<br>194 (32)                         | 421 (100),<br>494 (10) |
| <b>2,6-diF</b><br>CD3OD             | 9.00 (9.3)<br>d, 2H   | 8.27 (7.8)<br>t, 2H | 8.60 (7.8)<br>t, 2H             | 8.44 (8.3)<br>d, 2H             |                            | 7.58 (8.8)<br>m, 2H (+H22) | 7.64 (8.3)<br>m, 1H   | 7.58 (8.8)<br>m, 2H (+H20) |                            | 4.99 s, 3H | 350 (24),<br>351 (32)                   | 193 (100),<br>192 (86)                         | 151 (83),<br>500 (42)  |
| <b>2,6-diCl</b><br>CD3OD            | 9.00 (9.3)<br>d, 2H   | 8.28 (7.8)<br>t, 2H | 8.60 (7.8)<br>t, 2H             | 8.78 (8.3)<br>d, 2H             |                            | 7.88 (8.3)<br>d, 2H (+H22) | 7.73 (8.1)<br>t, 1H   | 7.88 (8.3)<br>d, 2H (+H20) |                            | 4.99 s, 3H | 383 (100)                               | 193 (100)                                      | 529 (21)               |
| <b>2,6-diBr</b><br>CD3OD            | 9.00 (9.3)<br>d, 2H   | 8.25 (7.6)<br>t, 2H | 8.59 (7.8)<br>t, 2H             | 8.96 (8.8)<br>d, 2H             |                            | 8.00 (8.3)<br>d, 2H (+H22) | 7.44 (8.1)<br>t, 1H   | 8.00 (8.3)<br>d, 2H (+H20) |                            | 4.99 s, 3H | 472 (25),<br>471 (33)                   | 193 (100)                                      | 440 (100),<br>622 (10) |
| <b>2,6-diI</b><br>CD3OD             | 9.16 (8.8)<br>d, 2H   | 8.21 (7.8)<br>t, 2H | 8.58 (7.8)<br>t, 2H             | 8.99 (9.3)<br>d, 2H             |                            | 8.12 (7.8)<br>d, 2H (+H22) | 7.02 (7.8)<br>t, 1H   | 8.12 (7.8)<br>d, 2H (+H20) |                            | 5.00 s, 3H | 565 (100);<br>566 (76)                  |                                                | 376 (44),<br>575 (38)  |
| <b>3-F</b><br>DMSO-d6               | 8.96 (9.3)<br>d, 2H   | 8.18 (7.8)<br>t, 2H | 8.57 (8.0)<br>t, 2H             | 8.68 (8.8)<br>d, 2H             | 7.89 (9.3)<br>d, 1H        |                            | 7.40 (7.4)<br>m, 1H   | 7.64 (9.3)<br>t, 1H        | 7.71 (8.3)<br>q, 1H        | 4.97 s, 3H | 332 (83)                                | 192 (100),<br>193 (21)                         | 165 (16),<br>220 (11)  |
| <b>4-F</b><br>CD3OD                 | 8.90 (9.3)<br>d, 2H   | 8.20 (7.6)<br>t, 2H | 8.57 (8.1)<br>t, 2H             | 8.65 (8.8)<br>d, 2H             | 7.70 (6.8)<br>m, 2H (+H23) | 7.37 (8.8)<br>t, 2H (+H22) |                       | 7.37 (8.8)<br>t, 2H (+H20) | 7.69 (6.8)<br>m, 2H (+H19) | 5.05 s, 3H | 332 (78),<br>333 (46)                   | 192 (90),<br>193 (100)                         | 221 (14),<br>482 (32)  |
| <b>4-Cl</b><br>CD3OD                | 8.96 / (9.3)<br>d, 2H | 8.18 (8.3)<br>t, 2H | 8.57 (7.3)<br>t, 2H             | 8.66 (8.8)<br>d, 2H             | 7.74 (8.8)<br>d, 2H (+H23) | 7.86 (8.8)<br>d, 2H (+H22) |                       | 7.86 (8.8)<br>d, 2H (+H20) | 7.74 (8.8)<br>d, 2H (+H19) | 4.97 s, 3H | 349 (35)                                | 192 (100),<br>193 (26)                         | 151 (36)               |
| <b>4-Br</b><br>CD3OD                | 8.90 (9.3)<br>d, 2H   | 8.20 (7.8)<br>t, 2H | 8.57 (8.3)<br>t, 2H             | 8.65 (8.3)<br>d, 2H             | 7.62 (8.8)<br>d, 2H (+H23) | 7.79 (8.8)<br>d, 2H (+H22) |                       | 7.79 (8.8)<br>d, 2H (+H20) | 7.62 (8.8)<br>d, 2H (+H19) | 5.05 s, 3H | 394 (30),<br>393 (22)                   | 193 (100),<br>194 (34)                         | 151 (12),<br>165 (13)  |

*Abbreviations and notes:*

s – singlet, d – doublet, t – triplet, q – quartet, sxt – sextet, m – multiplet; nH – relative area under signal (H integration).

\* values denote chemical shifts according to TMS (in ppm), values in parentheses denote coupling constants (in Hz); \*\*numbers denote relative mass of the ion (m/z), numbers in parentheses denote its relative abundance (in %);  $\text{M}^+$  denotes the parent cation of XAE,  $\text{MeAcr}^+$  denotes 10-methylacridinium cation

**Table S2**  $^{13}\text{C}$  NMR (room temperature) data for 9-(phenoxy-carbonyl)-10-methylacridinium trifluoromethanesulfonates (XAEs) substituted in the benzene ring. Structures, names and codes of the compounds with the numbering of atoms are given in Scheme 1.

| compound code<br>(Scheme 1)       | $^{13}\text{C}$ NMR* |       |       |       |       |         |         |       |       |       |       |       |       |       |      |       |
|-----------------------------------|----------------------|-------|-------|-------|-------|---------|---------|-------|-------|-------|-------|-------|-------|-------|------|-------|
|                                   | C1/C8                | C2/C7 | C3/C6 | C4/C5 | C9    | C11/C14 | C12/C13 | C15   | C18   | C19   | C20   | C21   | C22   | C23   | C24  | R     |
| <b>2-F</b><br>CD3OD               | 129.3                | 133.8 | 139.3 | 123.1 | 142.4 | 119.1   | 147.4   | 162.3 | 147.7 | 129.3 | 128.9 | 123.8 | 127.9 | 114.9 | 38.9 |       |
| <b>2-Cl</b><br>CD3OD              | 126.1                | 130.7 | 139.3 | 123.1 | 142.4 | 123.8   | 146.0   | 162.4 | 147.7 | 129.3 | 128.7 | 127.7 | 128.7 | 119.1 | 38.8 |       |
| <b>2-Br</b><br>CD3CN              | 124.7                | 134.7 | 140.3 | 123.7 | 142.9 | 119.9   | 147.8   | 163.5 | 148.0 | 134.0 | 130.2 | 128.5 | 130.0 | 115.7 | 40.3 |       |
| <b>2-I</b><br>CD3CN               | 128.8                | 140.9 | 142.9 | 124.0 | 144.6 | 123.7   | 148.0   | 164.1 | 151.1 | 140.3 | 130.9 | 130.0 | 130.2 | 119.9 | 40.3 |       |
| <b>2-CF<sub>3</sub></b><br>CD3CN  | 128.3                | 130.4 | 135.0 | 125.0 | 143.0 | 123.6   | 147.4   | 163.5 | 147.5 | 140.2 | 128.7 | 128.3 | 128.4 | 120.0 | 40.4 | 128.1 |
| <b>2-NO<sub>2</sub></b><br>CD3CN  | 125.9                | 130.4 | 136.5 | 123.9 | 142.4 | 123.0   | 142.9   | 163.3 | 147.0 | 140.2 | 129.5 | 127.1 | 128.4 | 119.9 | 40.4 |       |
| <b>2-OCH<sub>3</sub></b><br>CD3OD | 122.2                | 129.1 | 138.6 | 121.1 | 142.3 | 119.9   | 149.1   | 162.6 | 150.9 | 139.3 | 128.4 | 123.1 | 128.1 | 112.8 | 38.6 | 55.3  |
| <b>2,6-diF</b><br>CD3OD           | 127.1                | 139.4 | 142.4 | 123.1 | 146.9 | 119.3   | 153.9   | 161.7 | 155.9 | 112.7 | 129.6 | 125.6 | 128.7 | 112.6 | 38.9 |       |
| <b>2,6-diCl</b><br>CD3OD          | 129.2                | 139.3 | 139.3 | 127.9 | 142.4 | 123.4   | 142.8   | 161.5 | 146.8 | 119.2 | 129.6 | 128.2 | 129.3 | 119.2 | 39.0 |       |
| <b>2,6-diBr</b><br>CD3OD          | 133.4                | 139.3 | 139.3 | 123.5 | 142.4 | 119.1   | 145.5   | 161.3 | 146.5 | 116.9 | 130.0 | 128.4 | 129.1 | 116.9 | 39.1 |       |
| <b>2,6-diI</b><br>CD3OD           | 139.2                | 140.5 | 142.4 | 123.5 | 146.3 | 121.7   | 148.0   | 161.2 | 152.0 | 119.0 | 129.2 | 128.9 | 128.9 | 119.1 | 39.2 |       |
| <b>3-F</b><br>CD3CN               | 132.0                | 132.1 | 140.3 | 123.5 | 142.9 | 119.9   | 148.3   | 163.9 | 151.0 | 115.2 | 110.4 | 130.4 | 128.4 | 117.9 | 40.2 |       |
| <b>4-F</b><br>CD3CN               | 128.5                | 130.3 | 140.2 | 123.5 | 142.9 | 123.0   | 146.3   | 162.5 | 148.5 | 120.5 | 124.1 | 117.3 | 124.1 | 119.8 | 40.2 |       |
| <b>4-Cl</b><br>CD3OD              | 129.8                | 132.6 | 139.3 | 127.7 | 142.4 | 127.7   | 148.1   | 163.0 | 148.6 | 122.9 | 129.4 | 119.1 | 129.4 | 122.9 | 38.8 |       |
| <b>4-Br</b><br>CD3CN              | 128.4                | 130.4 | 133.8 | 124.3 | 140.2 | 123.5   | 142.9   | 163.9 | 149.6 | 120.7 | 128.4 | 119.8 | 128.4 | 120.7 | 40.2 |       |

*Abbreviations and notes:*

\* values denote chemical shifts according to TMS (in ppm)

**Table S3** An exemplary  $^1\text{H}$  NMR data for **4-F** (Scheme 1) and its unmethylated precursor, 9-[(4-fluorophenoxy)carbonyl]acridine obtained with the assistance of ACD/HNMR database<sup>55</sup>. Chemical shifts, assayed with the coefficient of variation (CV) in the range of 0.10–4.1%, are averaged for each group of protons.

| No. of $^1\text{H}$ nuclei (Scheme 1)                                     | chem. shift (ppm) | std. dev. (ppm) | relative intensity (integration) | coupling constants ( $^n\text{J}$ , Hz)                                                                                                                    |
|---------------------------------------------------------------------------|-------------------|-----------------|----------------------------------|------------------------------------------------------------------------------------------------------------------------------------------------------------|
| 9-[(4-Fluorophenoxy)carbonyl]acridine                                     |                   |                 |                                  |                                                                                                                                                            |
| 1/8                                                                       | 8.60              | 0.50            | 2H                               | $^3\text{J}_{1,2} = 7.61$ ; $^4\text{J}_{1,3} = 1.39$ ; $^5\text{J}_{1,4} = 0.65$                                                                          |
| 2/7                                                                       | 7.74              | 0.24            | 2H                               | $^3\text{J}_{7,8} = 7.61$ ; $^3\text{J}_{2,3} = 7.14$ ; $^4\text{J}_{2,4} = 1.32$                                                                          |
| 3/6                                                                       | 7.72              | 0.03            | 2H                               | $^3\text{J}_{3,4} = 8.08$ ; $^3\text{J}_{6,7} = 7.14$ ; $^4\text{J}_{6,8} = 1.39$                                                                          |
| 4/5                                                                       | 8.47              | 0.03            | 2H                               | $^3\text{J}_{5,6} = 8.08$ ; $^4\text{J}_{5,7} = 1.32$ ; $^5\text{J}_{5,8} = 0.65$                                                                          |
| 19/23                                                                     | 7.25              | 0.13            | 2H                               | $^4\text{J}_{19,23} = 3.35$                                                                                                                                |
| 20/22                                                                     | 7.12              | 0.12            | 2H                               | $^3\text{J}_{20,22;21\text{F}} = 6.32$                                                                                                                     |
| 9-[(4-Fluorophenoxy)carbonyl]-10-methylacridinium triflate ( <b>4-F</b> ) |                   |                 |                                  |                                                                                                                                                            |
| 1/8                                                                       | 8.95              | 0.01            | 2H                               | $^3\text{J}_{8,7} = 8.85$ ; $^4\text{J}_{8,6} = 1.72$ ; $^5\text{J}_{8,5} = 0.94$ ; $^5\text{J}_{1,4} = 0.50$                                              |
| 2/7                                                                       | 7.46              | 0.31            | 2H                               | $^3\text{J}_{2,1} = 8.85$ ; $^3\text{J}_{7,6} = 6.57$                                                                                                      |
| 3/6                                                                       | 7.95              | 0.22            | 2H                               | $^3\text{J}_{3,4} = 8.84$ ; $^4\text{J}_{3,1} = 1.72$                                                                                                      |
| 4/5                                                                       | 8.47              | 0.35            | 2H                               | $^3\text{J}_{5,6} = 8.84$ ; $^4\text{J}_{5,7} = 1.46$                                                                                                      |
| 19/23                                                                     | 7.25              | 0.13            | 2H                               | $^3\text{J}_{19,20} = 9.17$ ; $^4\text{J}_{19,21\text{F}} = ^4\text{J}_{23,21\text{F}} = 6.32$ ; $^4\text{J}_{19,23} = 3.35$ ; $^5\text{J}_{19,22} = 0.35$ |
| 20/22                                                                     | 7.12              | 0.12            | 2H                               | $^3\text{J}_{22,23} = 9.17$ ; $^3\text{J}_{20,21\text{F}} = ^3\text{J}_{22,21\text{F}} = 6.62$ ; $^4\text{J}_{20,22} = 2.85$ ; $^5\text{J}_{20,23} = 0.35$ |
| 24                                                                        | 4.22              | 0.04            | 3H                               | $^2\text{J}_{24,24} = 14.6$                                                                                                                                |

**Table S4** Chemiluminogenic properties of substituted 9-[(phenoxy)carbonyl]-10-methylacridinium triflates (XAEs, Scheme 1) in various environments;  $k_{CL}$  denotes the pseudo-first order constants of CL decay (in  $s^{-1}$ ),  $RCLE$  – relative CL efficiency, normalized to the highest value,  $QY$  – quantum yield (in %). The vales were obtained basing on five runs for each concentration of XAE, CV = 2–8%.

| compound code            | $k_{CL}^1$ | $k_{CL}^2$ | $k_{CL}^3$ | $k_{CL}^4$ | $RCLE^1$ | $RCLE^2$    | $RCLE^3$ | $RCLE^4$ | $QY^5$ | $RCLE$ in buffered solutions <sup>6</sup> |      |       | stability <sup>7</sup> |
|--------------------------|------------|------------|------------|------------|----------|-------------|----------|----------|--------|-------------------------------------------|------|-------|------------------------|
|                          |            |            |            |            |          |             |          |          |        | 12.0                                      | 10.0 | 8.0   |                        |
| <b>2-F</b>               | 4.44       | 5.19       | 2.91       | 6.77       | 0.808    | 0.880       | 0.544    | 0.410    | 2.31   | 83.5                                      | 46.7 | 18.4  | 51.5                   |
| <b>2-Cl</b>              | 4.29       | 4.24       | 2.88       | 6.77       | 0.729    | 0.774       | 0.489    | 0.417    | 2.08   | 80.5                                      | 65.8 | 17.8  | 42.1                   |
| <b>2-Br</b>              | 5.12       | 4.63       | 3.02       | 7.03       | 0.770    | 0.845       | 0.539    | 0.460    | 2.02   | 85.0                                      | 47.8 | 16.9  | 44.7                   |
| <b>2-I</b>               | 3.92       | 5.17       | 3.14       | 6.17       | 0.782    | 0.977       | 0.574    | 0.495    | 2.05   | 93.1                                      | 82.6 | 11.1  | 46.0                   |
| <b>2-CF<sub>3</sub></b>  | 3.95       | 4.06       | 2.77       | 7.54       | 0.662    | 0.704       | 0.444    | 0.287    | 1.74   | 73.0                                      | 64.4 | 40.5  | 44.6                   |
| <b>2-NO<sub>2</sub></b>  | 3.75       | 4.39       | 3.22       | 7.43       | 0.687    | 0.692       | 0.421    | 0.360    | 1.80   | 76.1                                      | 59.8 | 21.4  | 26.3                   |
| <b>2-OCH<sub>3</sub></b> | 0.42       | 0.91       | 0.29       | 0.21       | 0.635    | 0.765       | 0.475    | 0.513    | 1.67   | 70.1                                      | 19.3 | 0.474 | 71.9                   |
| <b>2,6-diF</b>           | 3.98       | 4.24       | 3.07       | 8.19       | 0.759    | 0.796       | 0.527    | 0.407    | 1.99   | 85.5                                      | 71.3 | 37.6  | 44.7                   |
| <b>2,6-diCl</b>          | 3.90       | 4.18       | 3.21       | 8.50       | 0.747    | 0.775       | 0.488    | 0.295    | 1.96   | 72.8                                      | 28.5 | 19.0  | 50.3                   |
| <b>2,6-diBr</b>          | 3.83       | 3.89       | 3.46       | 7.87       | 0.709    | 0.656       | 0.461    | 0.271    | 1.86   | 55.8                                      | 16.3 | 13.0  | 70.4                   |
| <b>3-F</b>               | 4.14       | 4.35       | 2.93       | 7.39       | 0.906    | <b>1.00</b> | 0.661    | 0.464    | 2.38   | 100                                       | 97.4 | 17.0  | 46.0                   |
| <b>4-F</b>               | 2.95       | 3.35       | 2.02       | 3.46       | 0.662    | 0.882       | 0.542    | 0.500    | 1.74   | 73.1                                      | 70.2 | 1.14  | 54.8                   |
| <b>4-Cl</b>              | 4.24       | 4.00       | 2.65       | 7.39       | 0.704    | 0.917       | 0.593    | 0.463    | 1.85   | 77.7                                      | 73.7 | 4.98  | 50.2                   |
| <b>4-Br</b>              | 3.97       | 4.19       | 3.23       | 7.23       | 0.762    | 0.920       | 0.612    | 0.505    | 2.00   | 84.1                                      | 80.4 | 5.03  | 51.8                   |

*Notes:*

Final concentrations of reagents (plate):

<sup>1</sup> $c_{XAE} = 2.0 \times 10^{-5}$  M in 1 mM HCl; triggers:  $c_{H_2O_2} = 4.5$  mM in 10 mM HNO<sub>3</sub>;  $c_{NaOH} = 50$  mM in H<sub>2</sub>O (standard triggering mixture)

<sup>2</sup> $c_{XAE} = 2.0 \times 10^{-5}$  M in 1 mM HCl; triggers:  $c_{H_2O_2} = 4.5$  mM in 10 mM HNO<sub>3</sub>;  $c_{TBAOH} = 50$  mM in H<sub>2</sub>O

<sup>3</sup> $c_{XAE} = 2.0 \times 10^{-5}$  M in 1 mM HCl; triggers:  $c_{H_2O_2} = 4.5$  mM in 10 mM HNO<sub>3</sub>;  $c_{DBU} = 50$  mM in H<sub>2</sub>O

<sup>4</sup> $c_{XAE} = 2.0 \times 10^{-5}$  M in CH<sub>3</sub>OH; triggers:  $c_{H_2O_2} = 4.5$  mM in CH<sub>3</sub>OH;  $c_{TBAOH} = 50$  mM in CH<sub>3</sub>OH

<sup>5</sup>Quantum yields (QY) were calculated for standard triggering system (see note 1) using luminol as standard.<sup>22</sup>

<sup>6</sup>Standard phosphate buffers were used (*Aldrich*); triggering system: see note 1.

<sup>7</sup>Samples of XAEs were incubated in Britton-Robinson phosphate buffer:  $c = 2.0 \times 10^{-5}$  M, pH = 8.0,  $T = 298$  K;  $t = 30$  min.; triggering system: see note 1.

Stabilities were calculated as % of the initial activity:  $100\% \times (\text{integral CL } (t = 30 \text{ min.}) / \text{integral CL } (t = 0 \text{ min.}))$ .

For details see Experimental section.



Entity no.  
(Scheme 2)

2-F

2-CF<sub>3</sub>

compound (Scheme 1)

2-NO<sub>2</sub>

2-OCH<sub>3</sub>

2,6-diBr

XAE

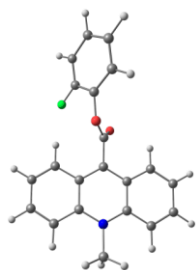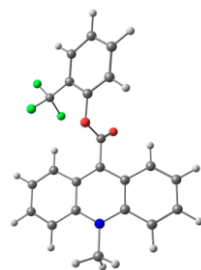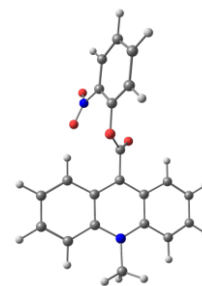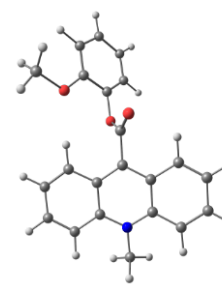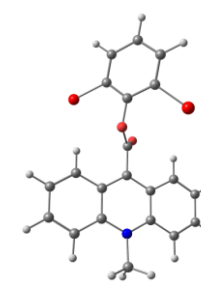

a

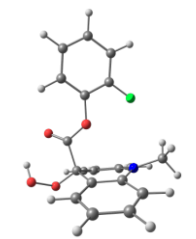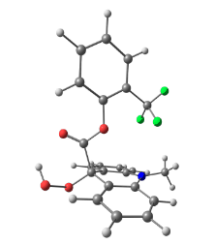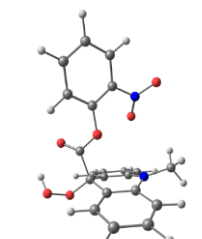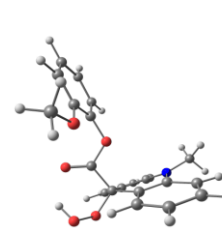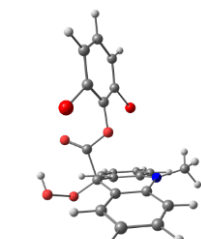

b

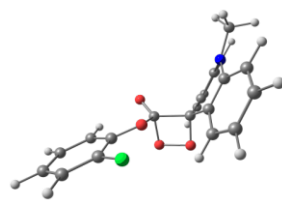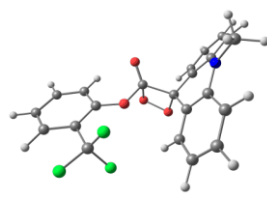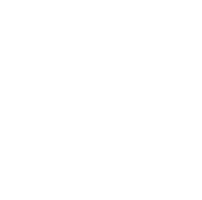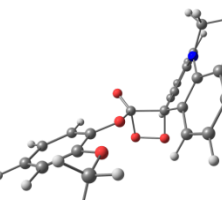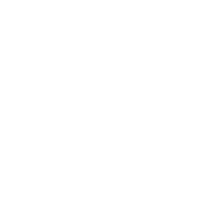

c

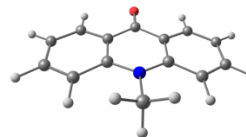

**d**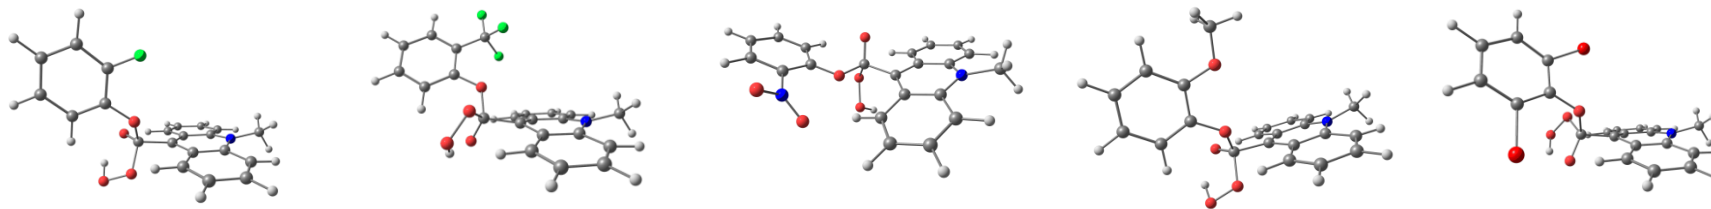**e**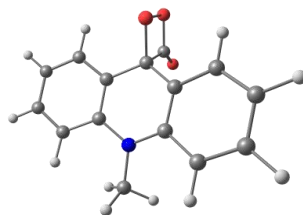**f**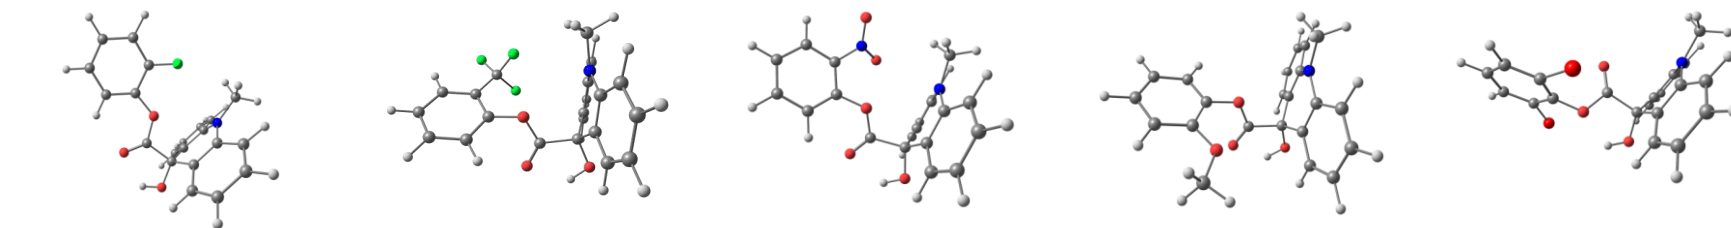**g**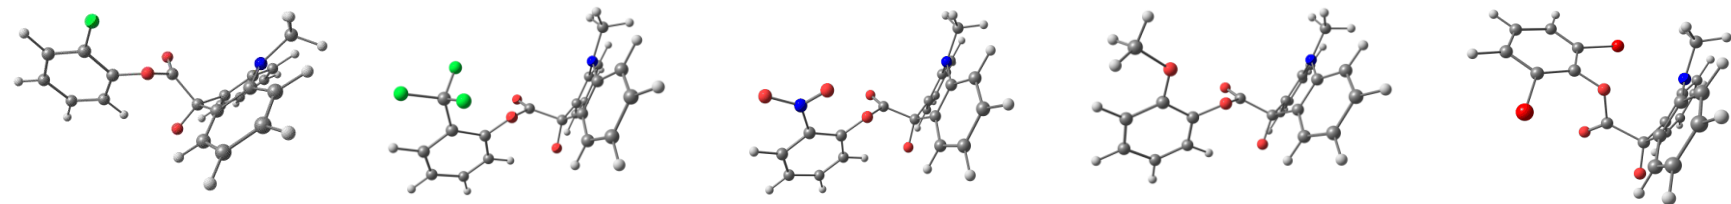**h**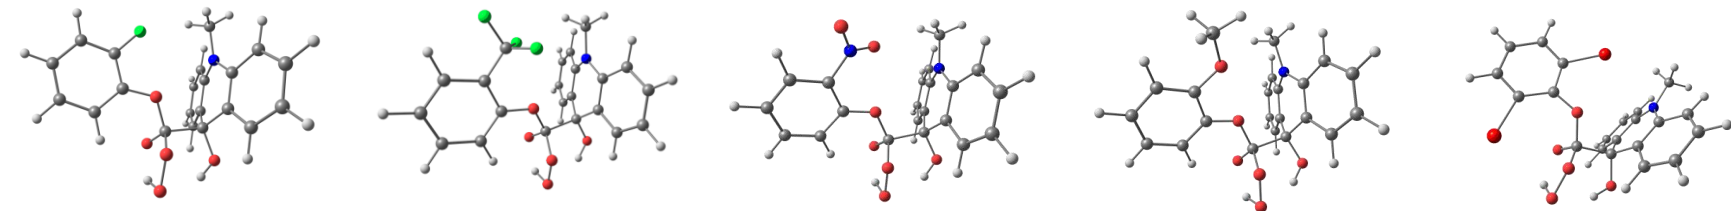

**i**

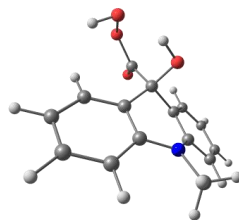

**j**

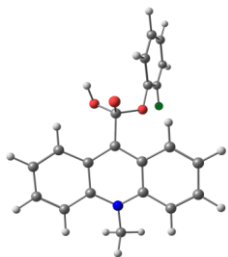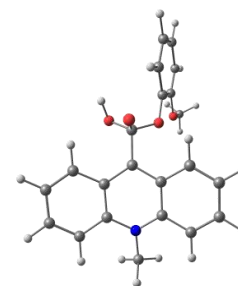

**k**

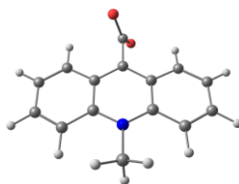

**l**

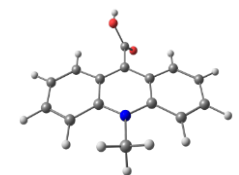

**TSVII**

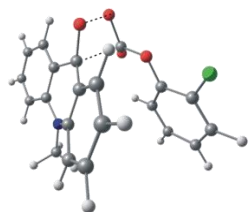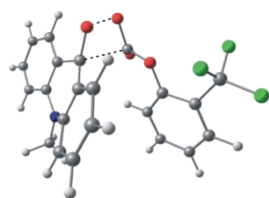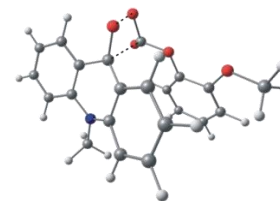

**TSX**

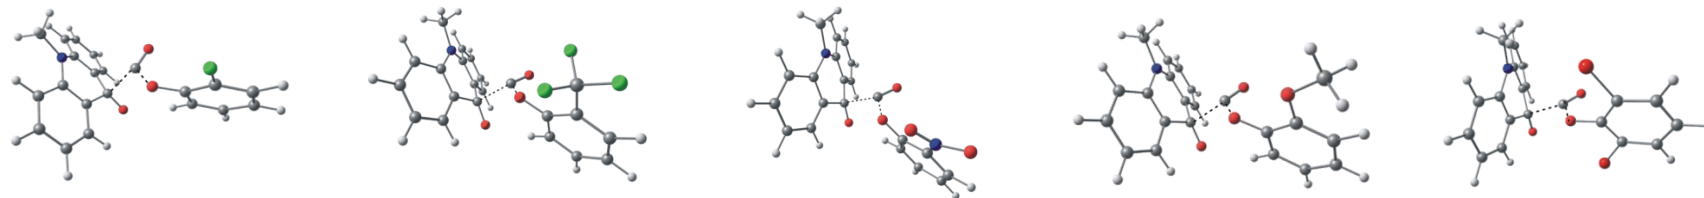

**TSXIII**

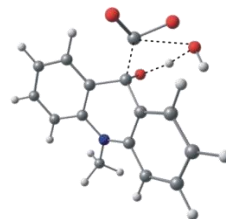

**TSXVIII**

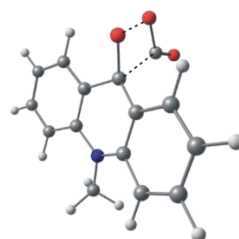

**Fig. S1** DFT (B3LYP/6-31G\*\*) optimized geometries of selected entities occurring on the reaction pathways of XAE's with  $\text{OOH}^-$  and  $\text{OH}^-$  (**TSVII**, **TSX**, **TSXIII**, **TSXVIII** represent transition state geometries; the dotted lines denote the bonds formed and broken during the course of the reaction).

9-[(2-fluorophenoxy)carbonyl]-10-methylacridinium (**2-F**)

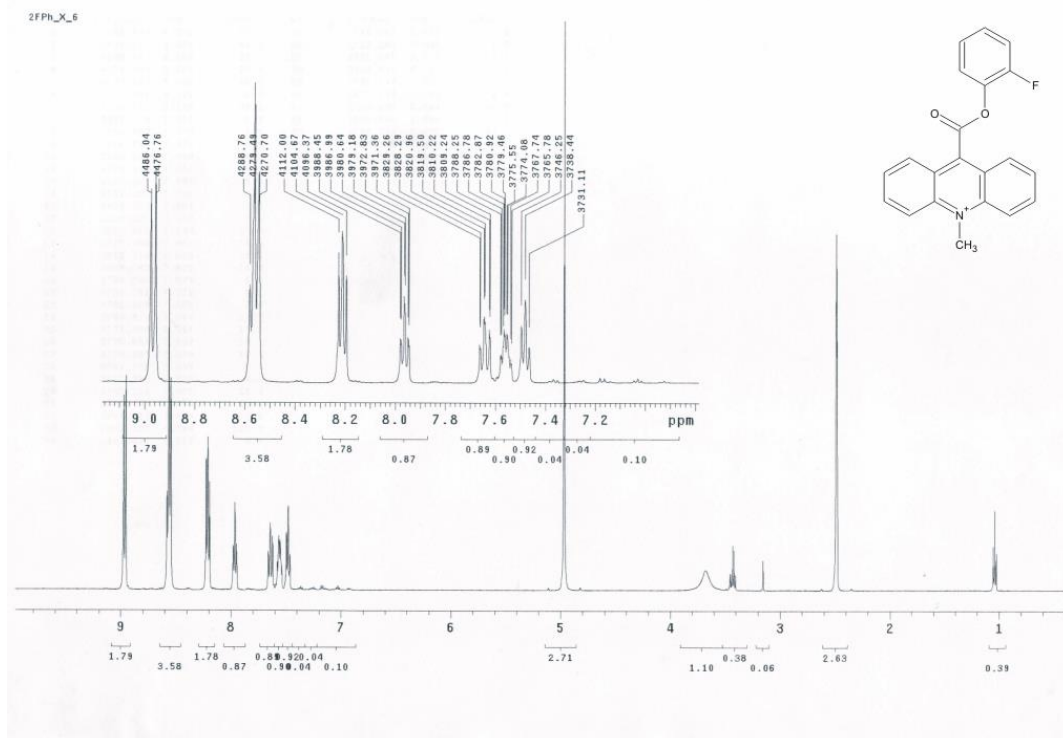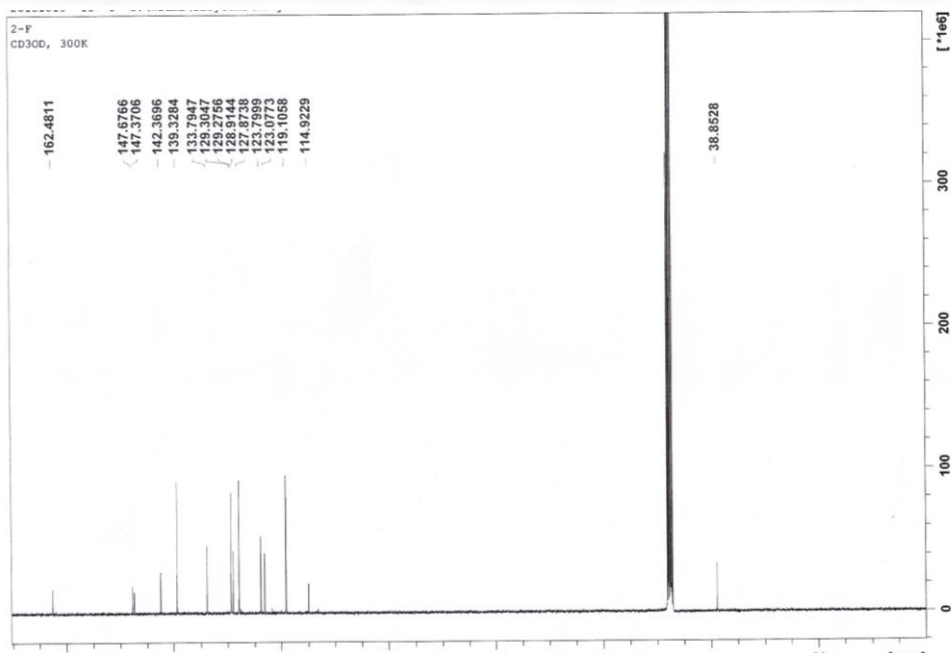

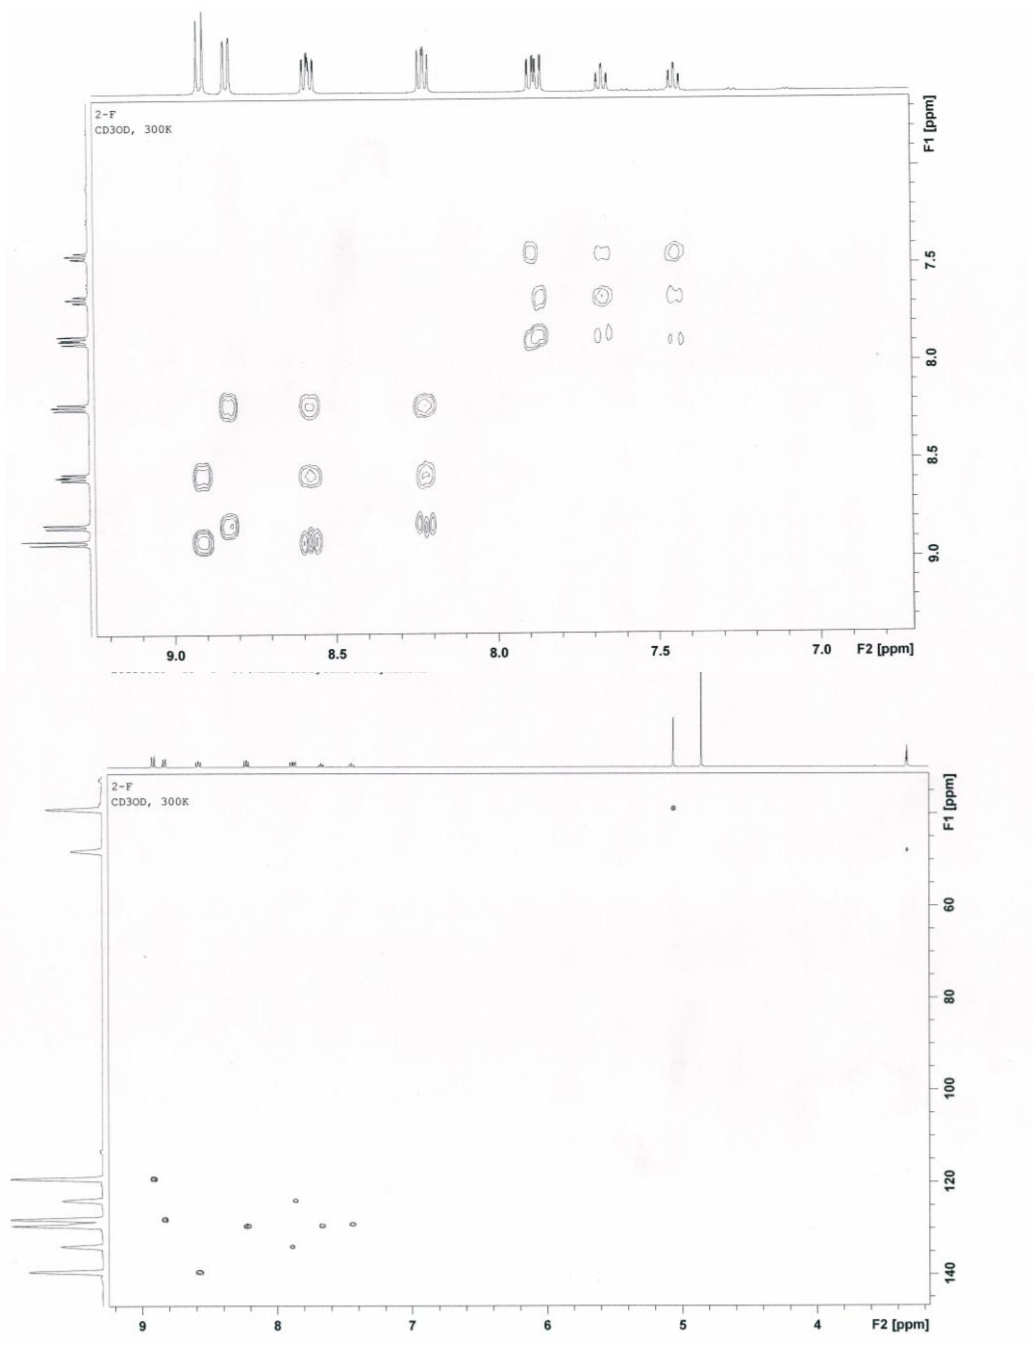

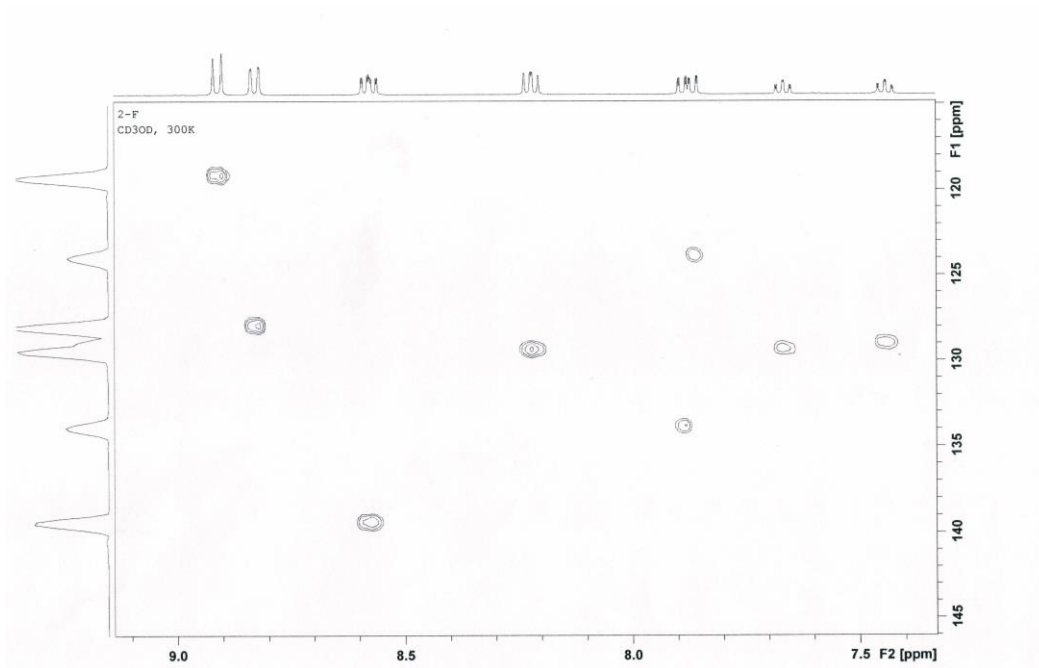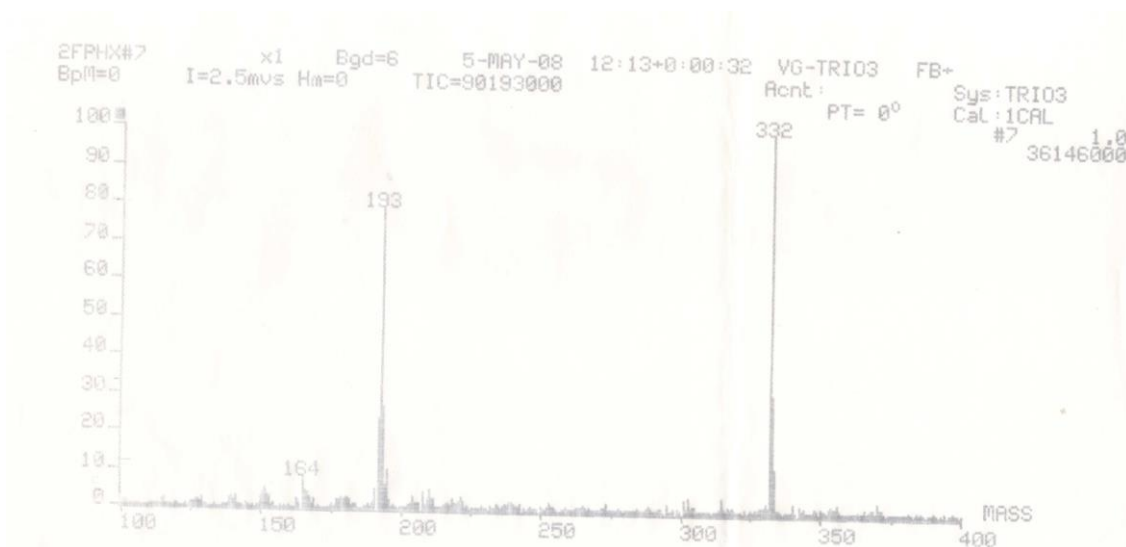

9-[(2-chlorophenoxy)carbonyl]-10-methylacridinium (2-Cl)

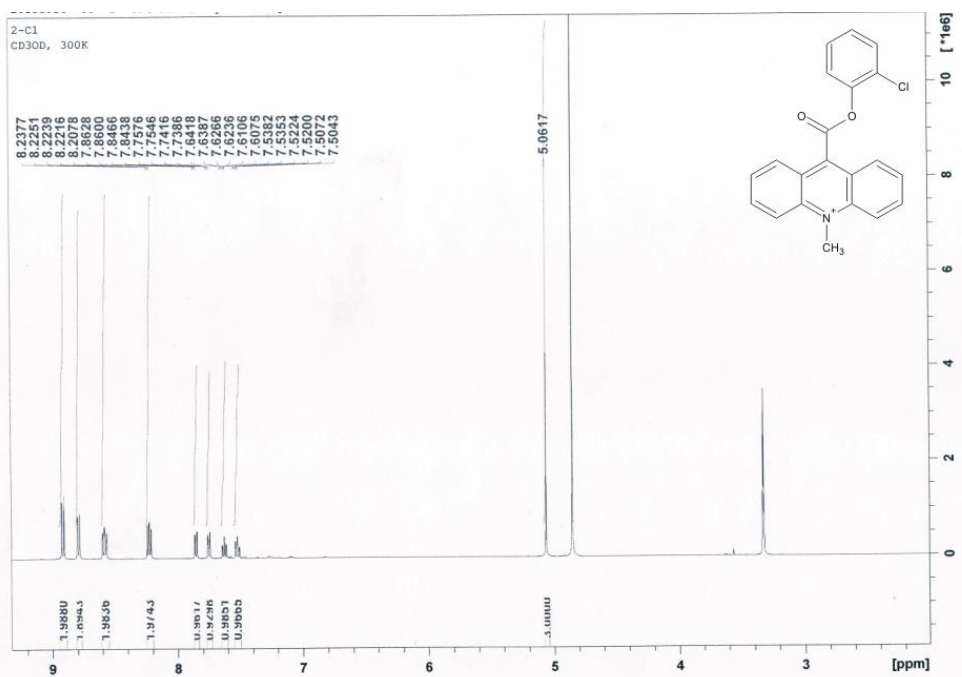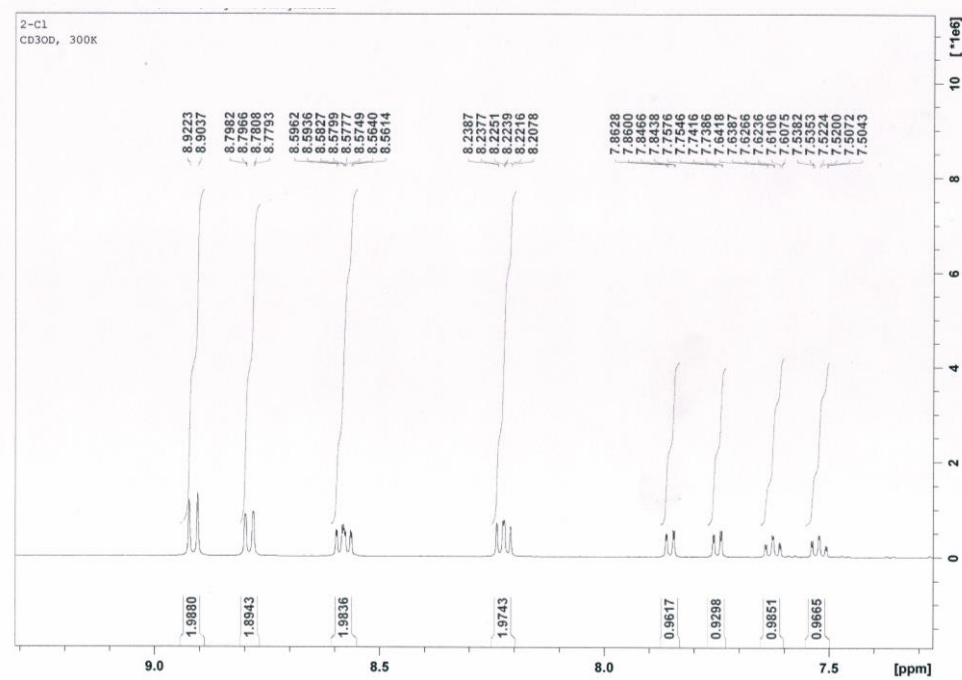



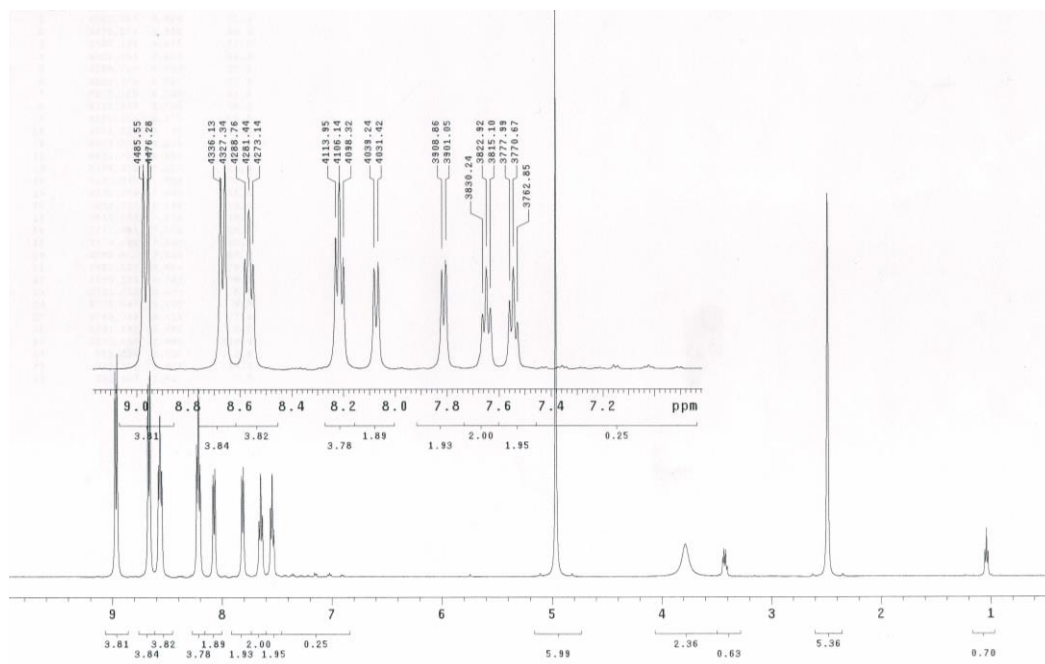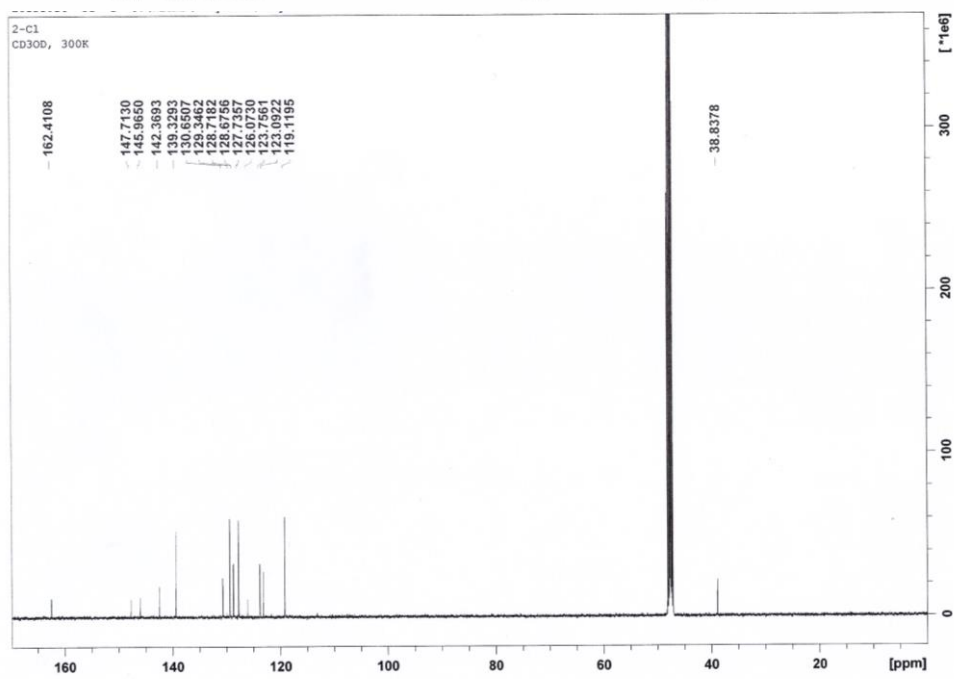

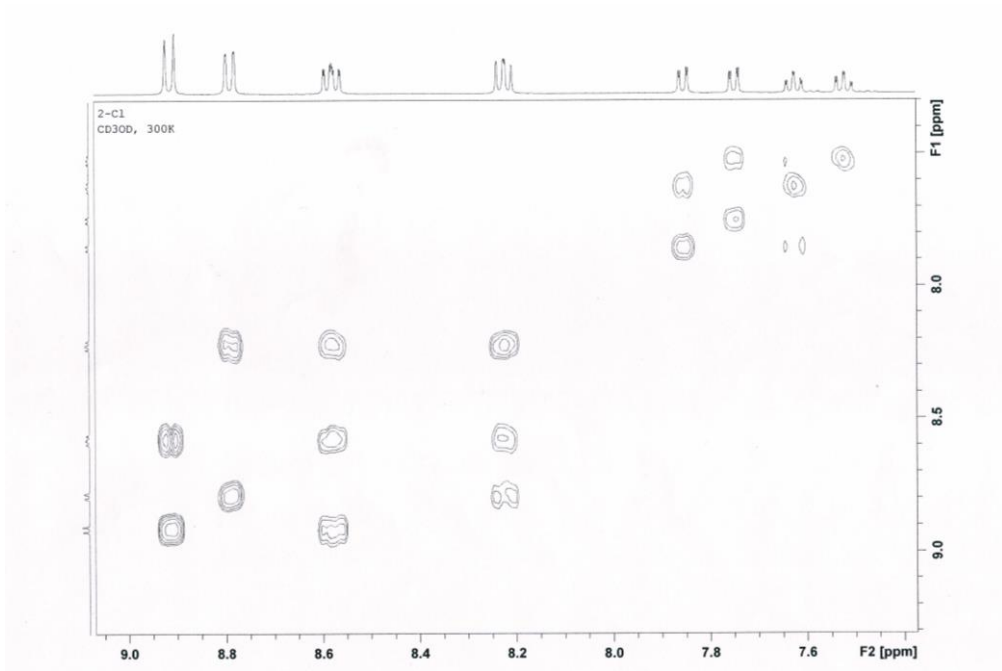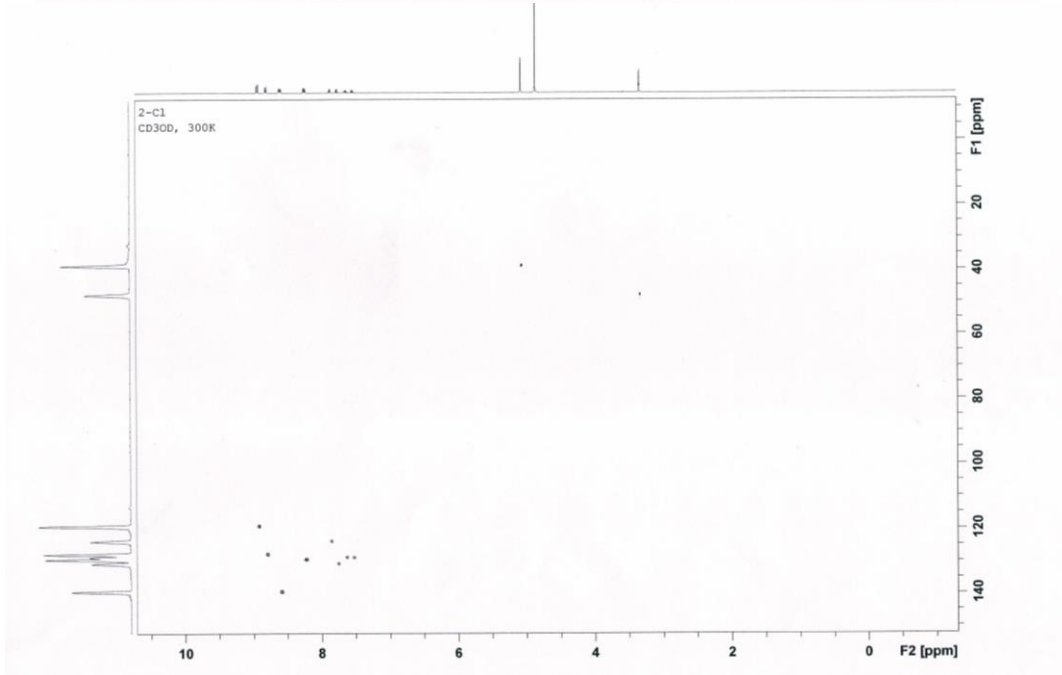

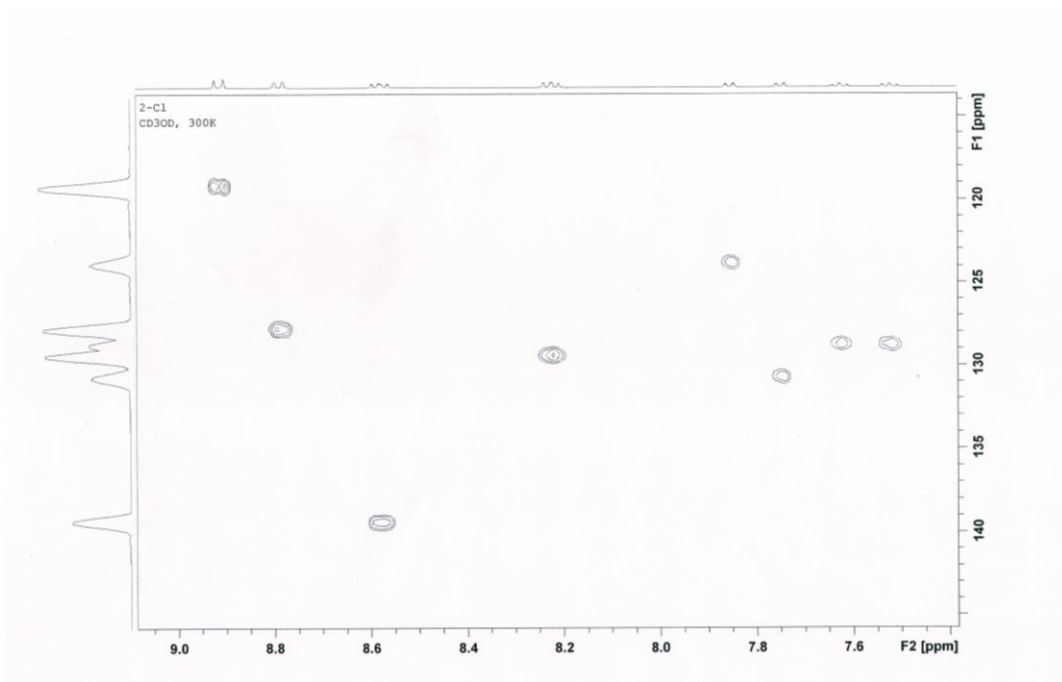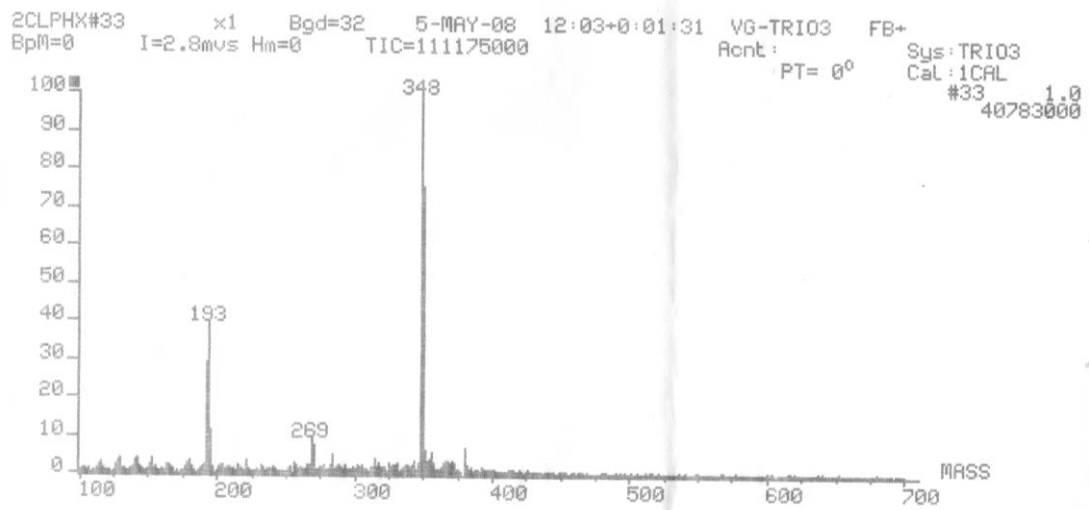

9-[(2-bromophenoxy)carbonyl]-10-methylacridinium (**2-Br**)

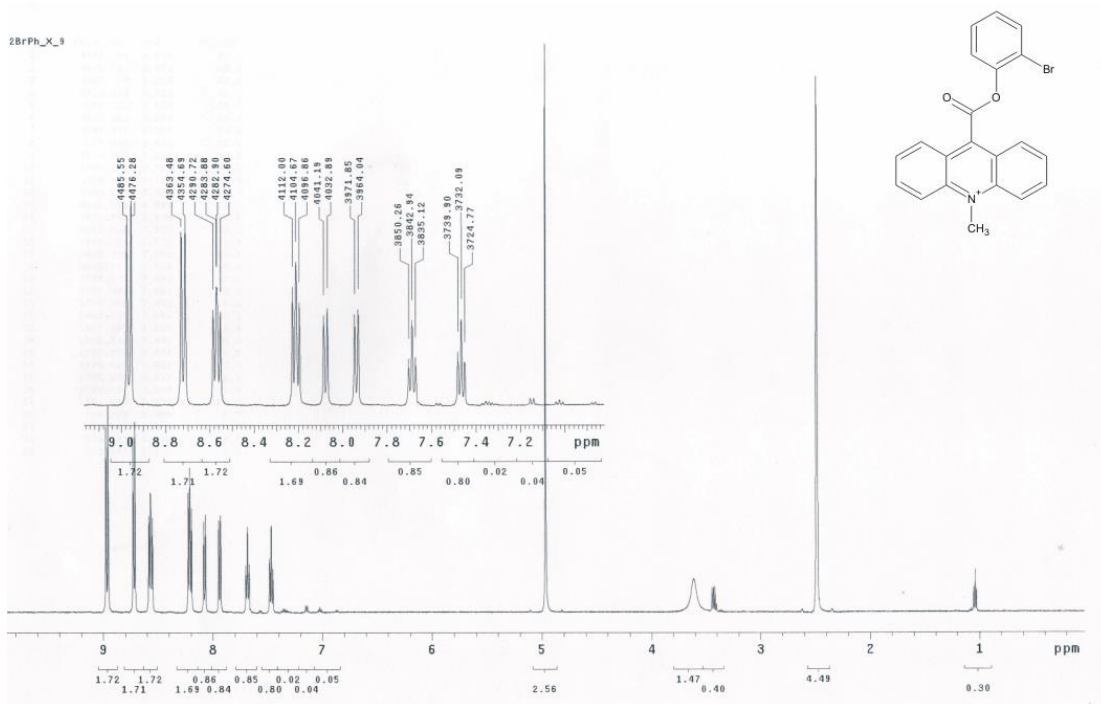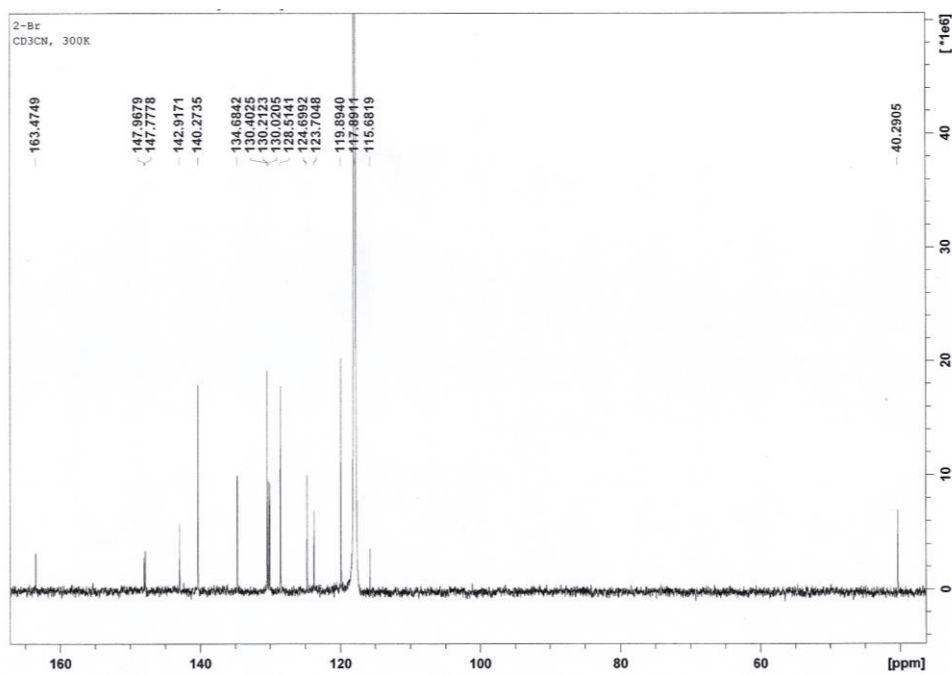

2BRPHX#12 x1 Bgd=10 5-MAY-08 11:55+0:00:45 VG-TRI03 FB+  
Bp#0 I=644µs Hm=0 TIC=124185000 Rent: Sys: TRI03  
PT= 0° CaL: 1CAL #12 1.0 9467000

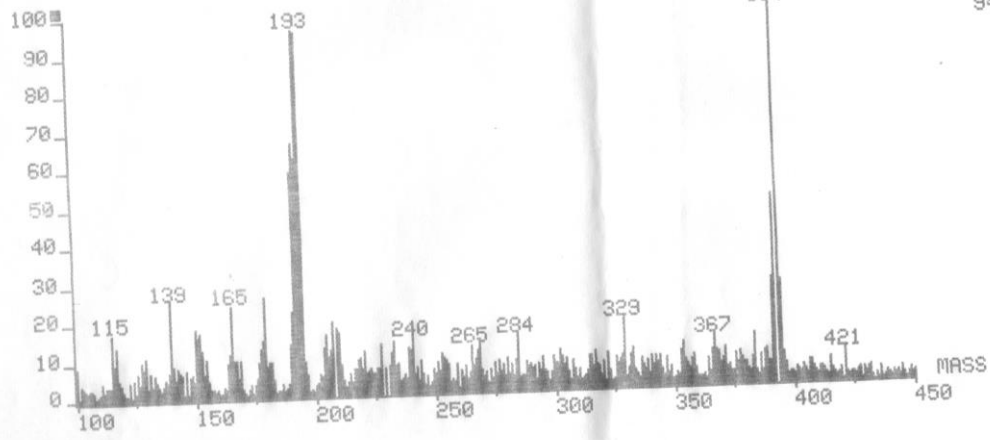



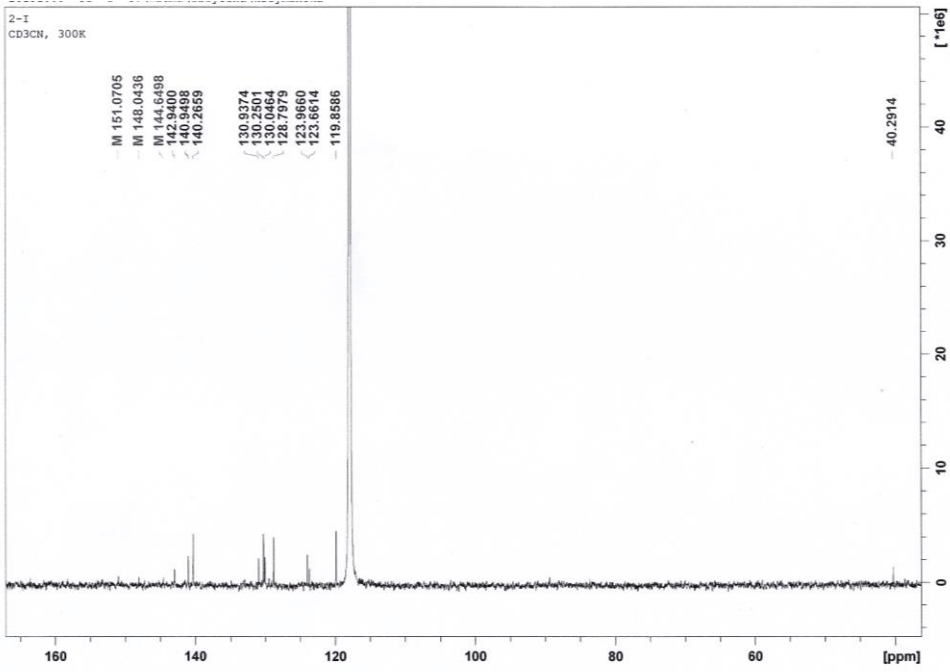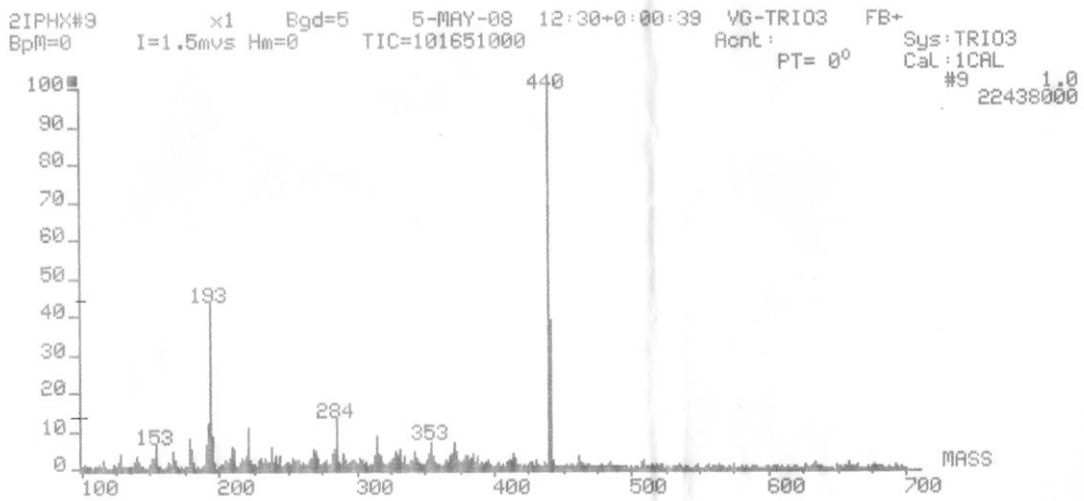

10-methyl-9-{{2-(trifluoromethyl)phenoxy}carbonyl}acridinium (2-CF<sub>3</sub>)

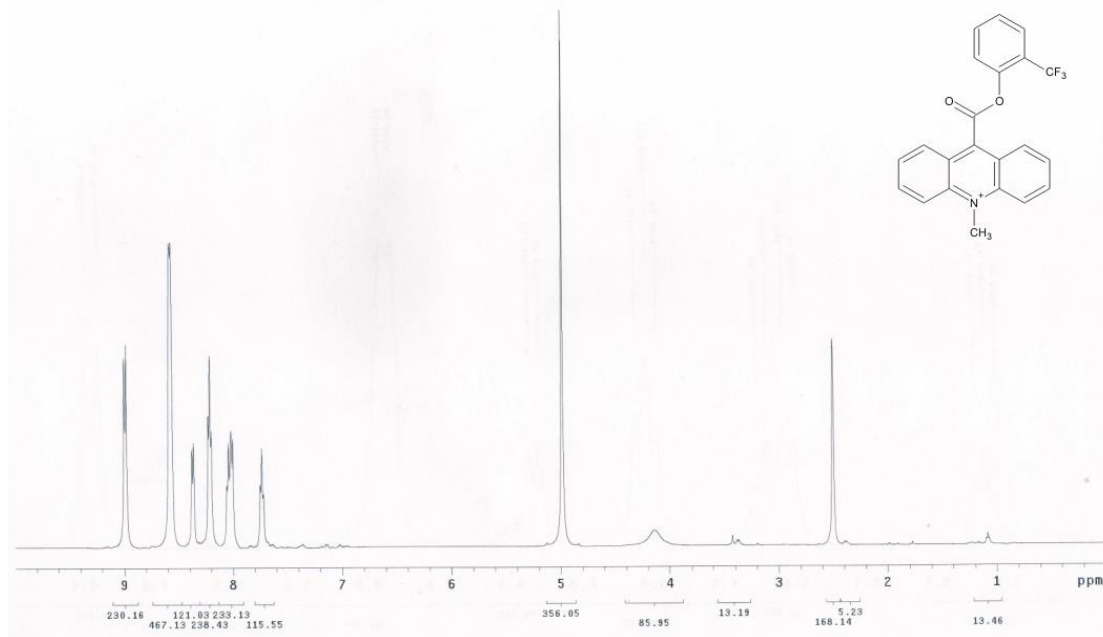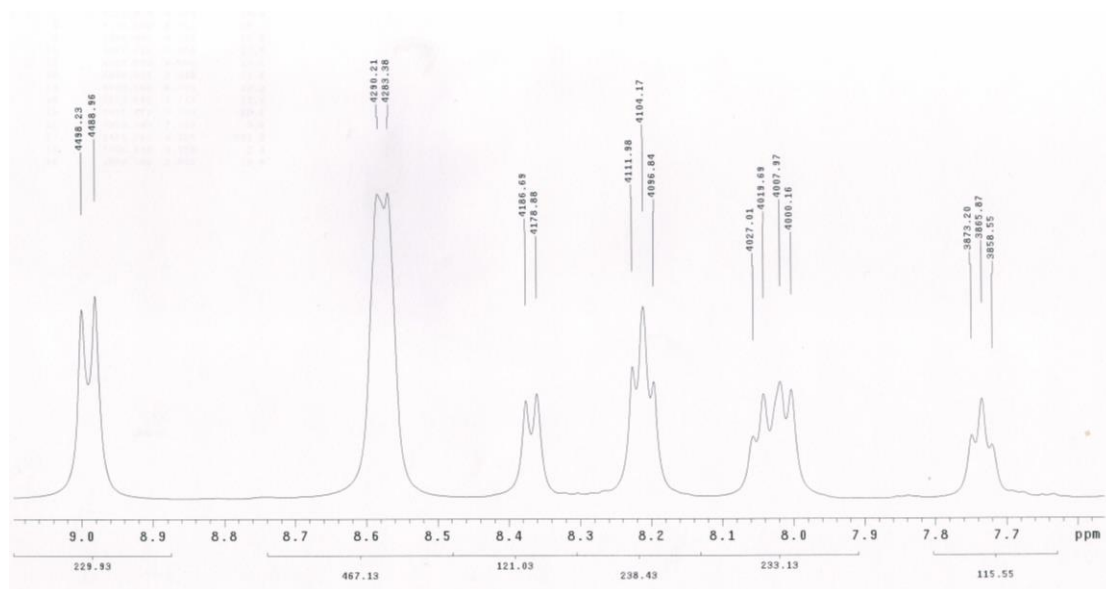



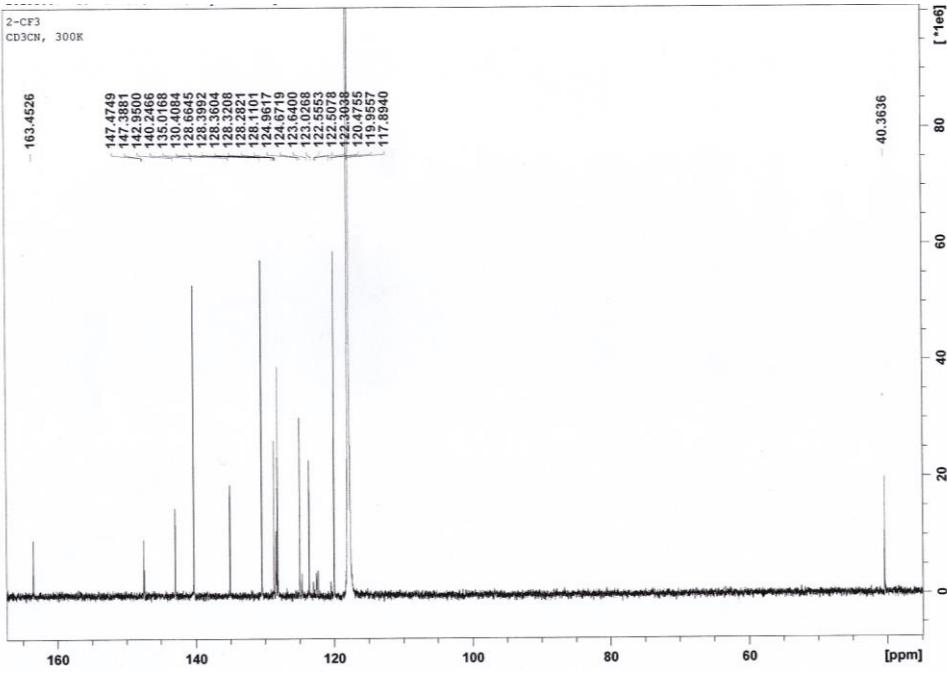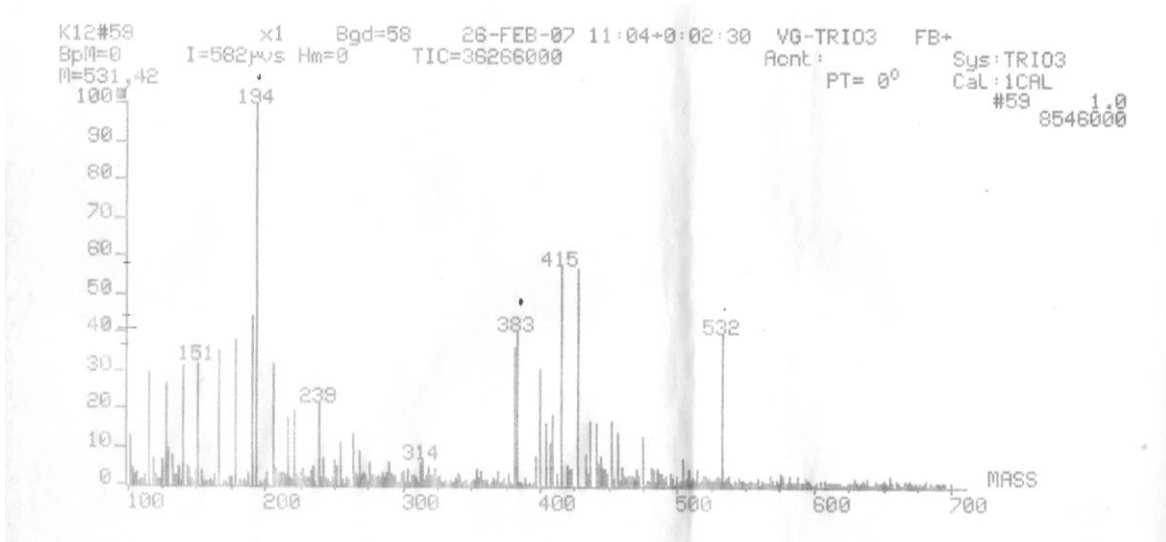

10-methyl-9-[(2-nitrophenoxy)carbonyl]acridinium (2-NO<sub>2</sub>)

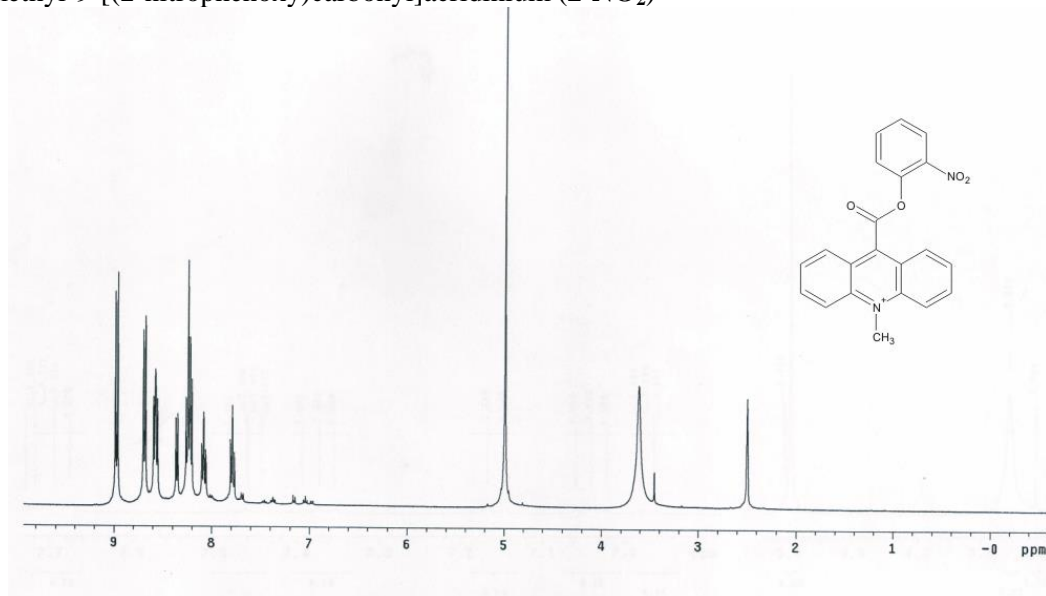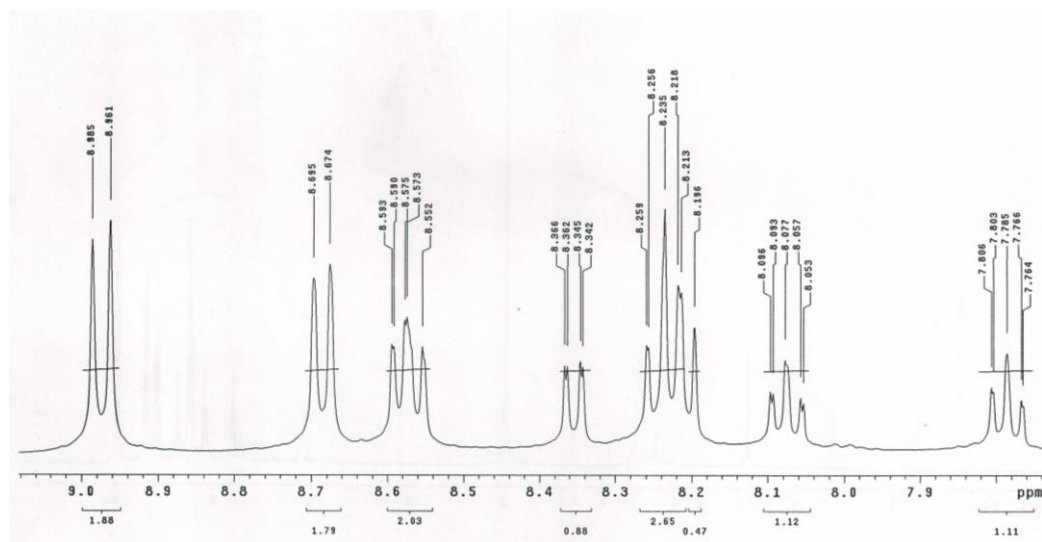

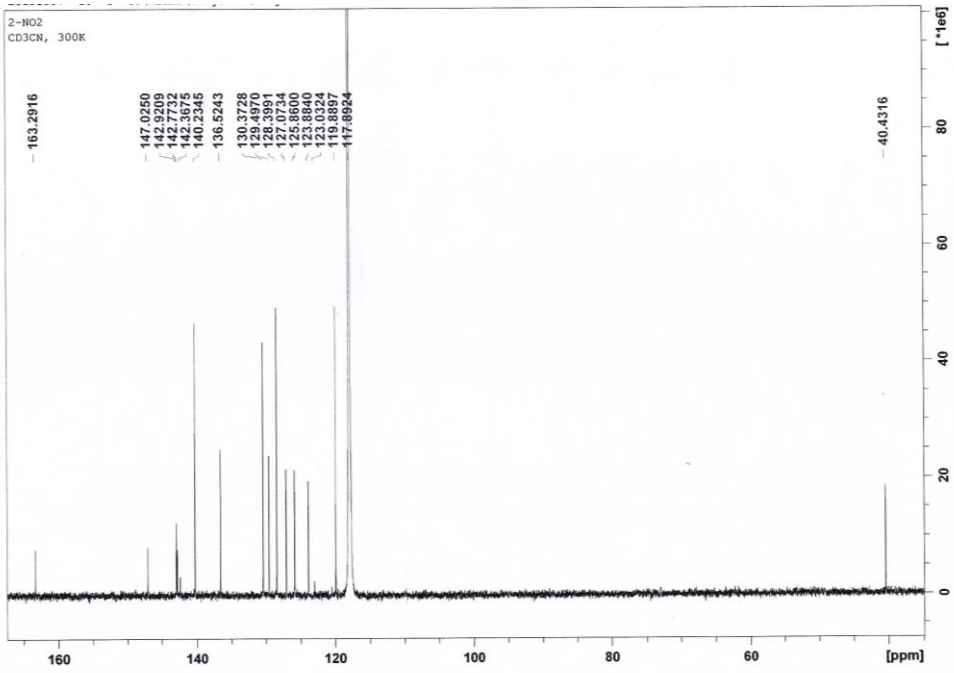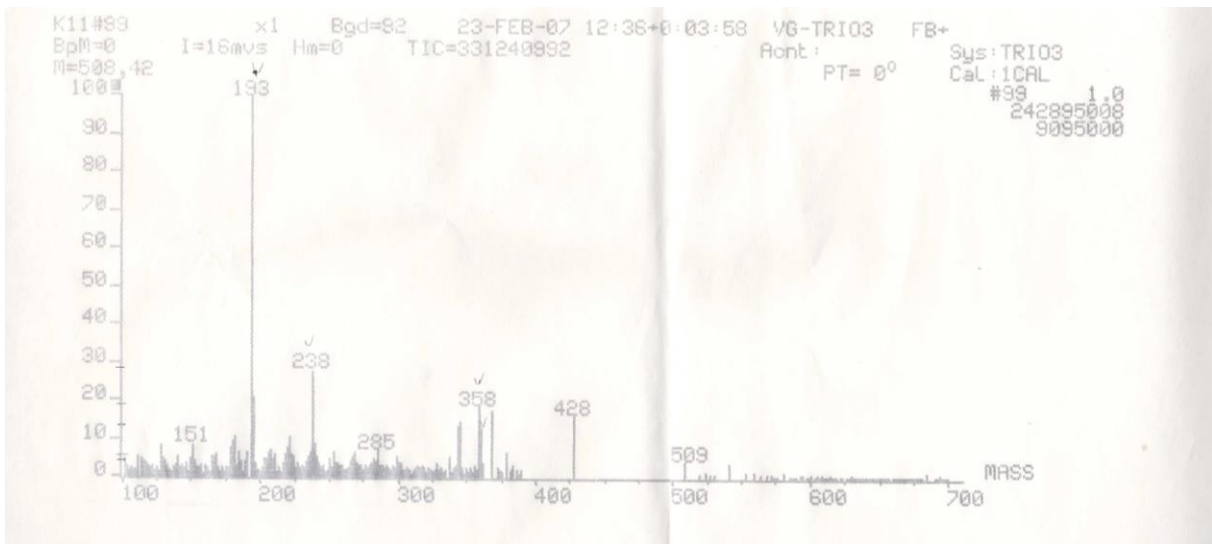

9-[(2-methoxyphenoxy)carbonyl]-10-methylacridinium (2-OCH<sub>3</sub>)

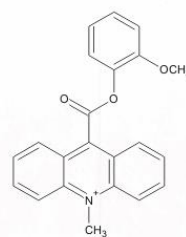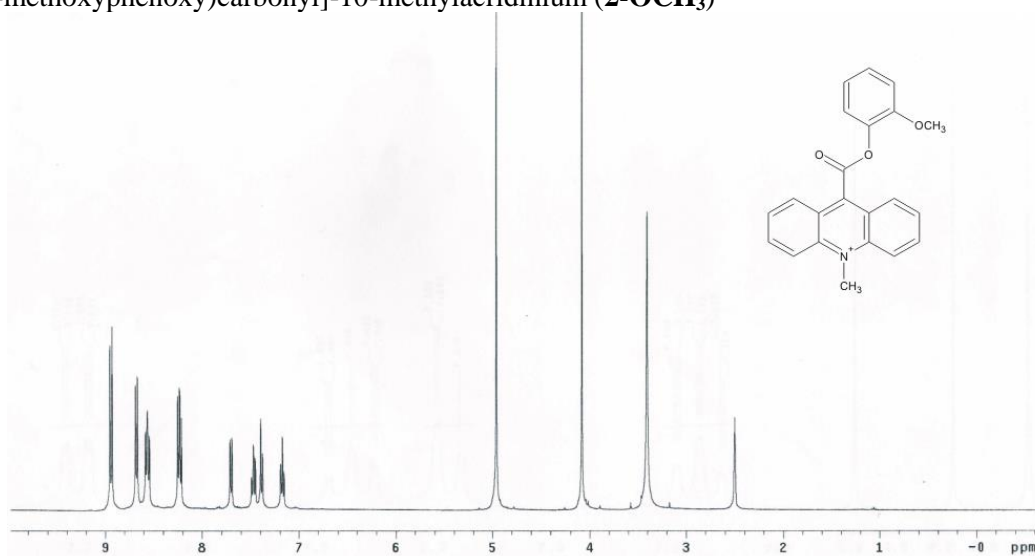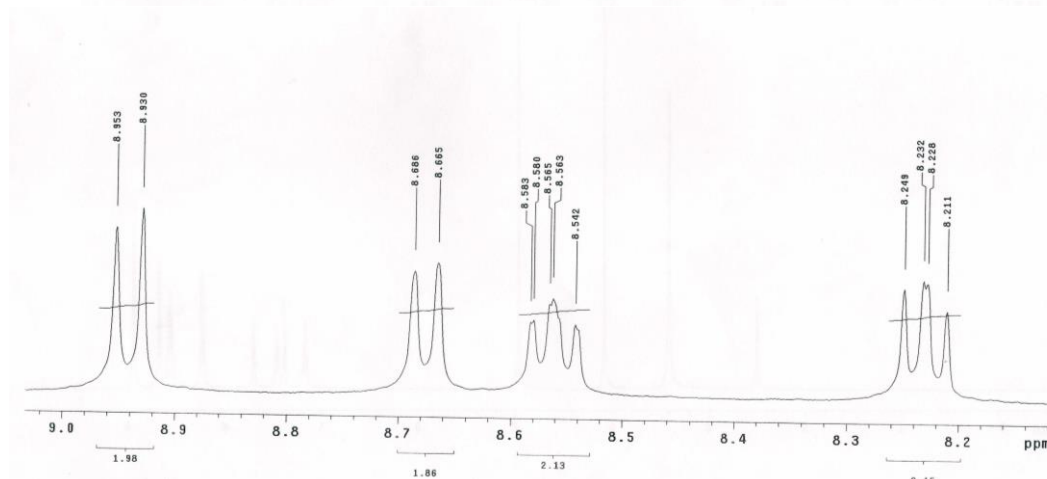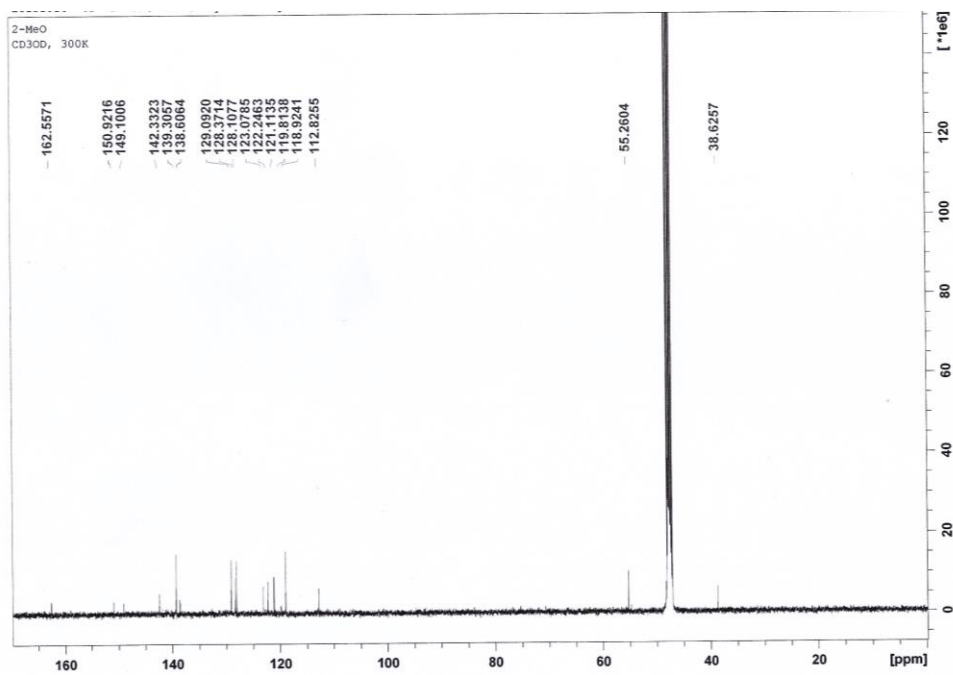

K10#12 x1 Bgd=3 23-FEB-07 21:18+0:00:46 VG-TRIO3 FB-  
SpM=0 I=7.8mvs Hm=0 TIC=143416000 Rcnt: Sys:TRIO3  
M=493.45 PT= 0° Cal:1CAL #12 1.0  
114438000

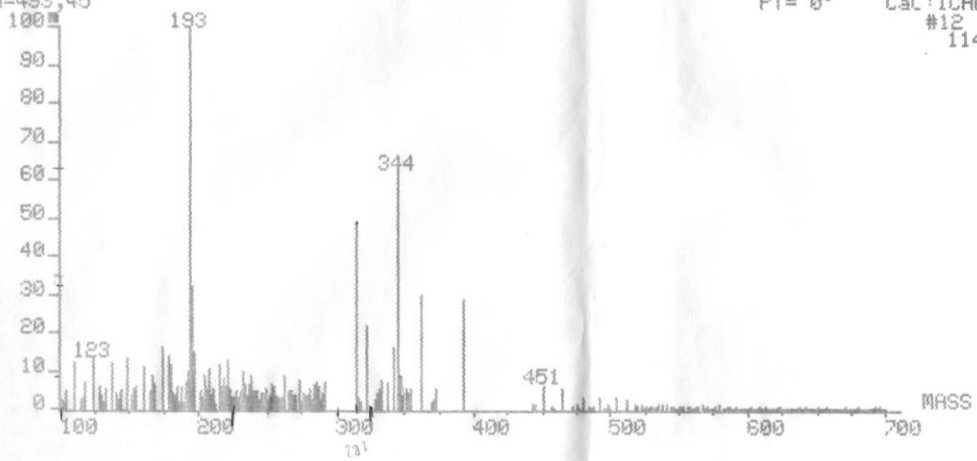

9-[(2,6-difluorophenoxy)carbonyl]-10-methylacridinium trifluoromethanesulfonate (**2,6-diF**)

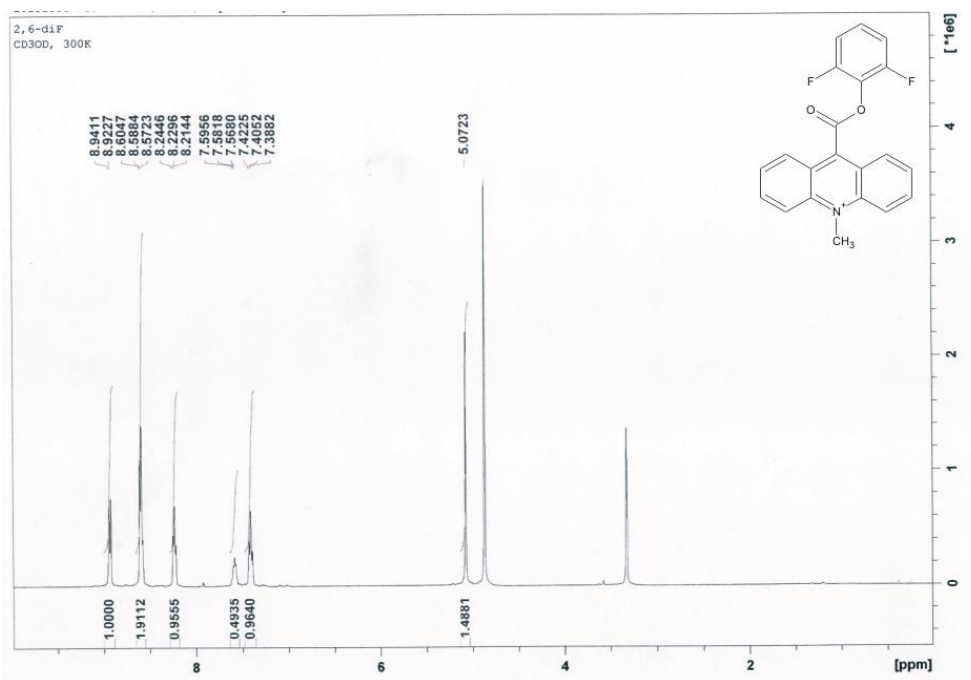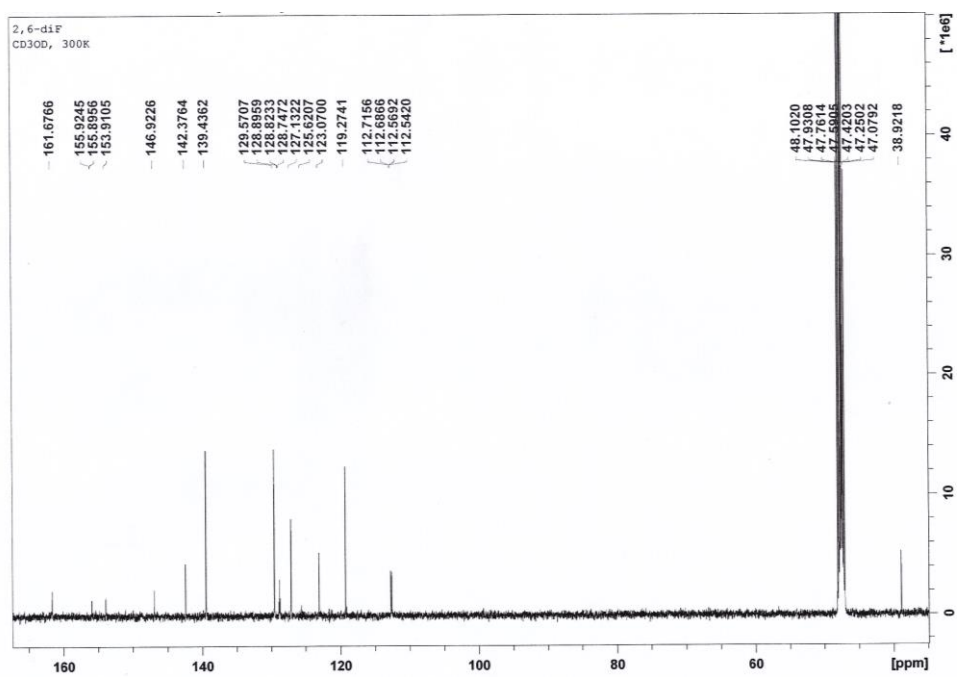

K4#30            x1    Bgd=17    23-FEB-07 11:05+0:01:24    VG-TRI03    FB+  
BpM=0    I=20pvs    Hm=0    TIC=2847000    Acnt:    Sus:TRI03  
-----  
M=489.40    PT= 0°    Cal:1CAL  
#30    1.0  
300000

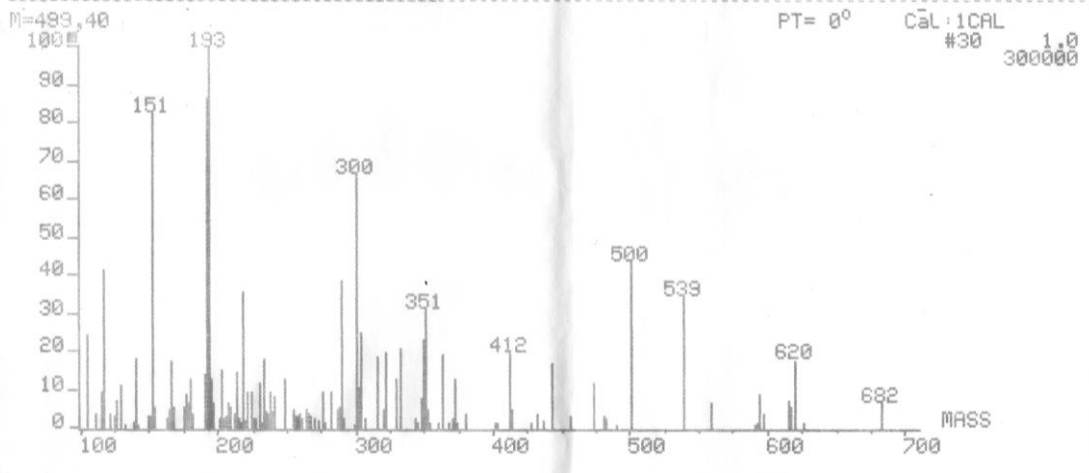

9-[(2,6-dichlorophenoxy)carbonyl]-10-methylacridinium trifluoromethanesulfonate (**2,6-diCl**)

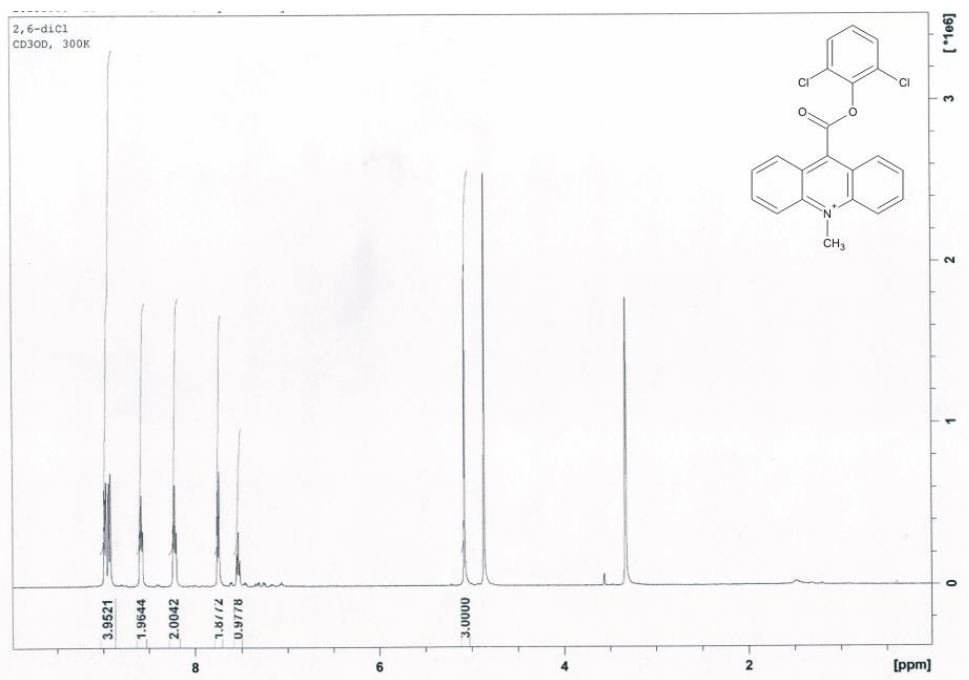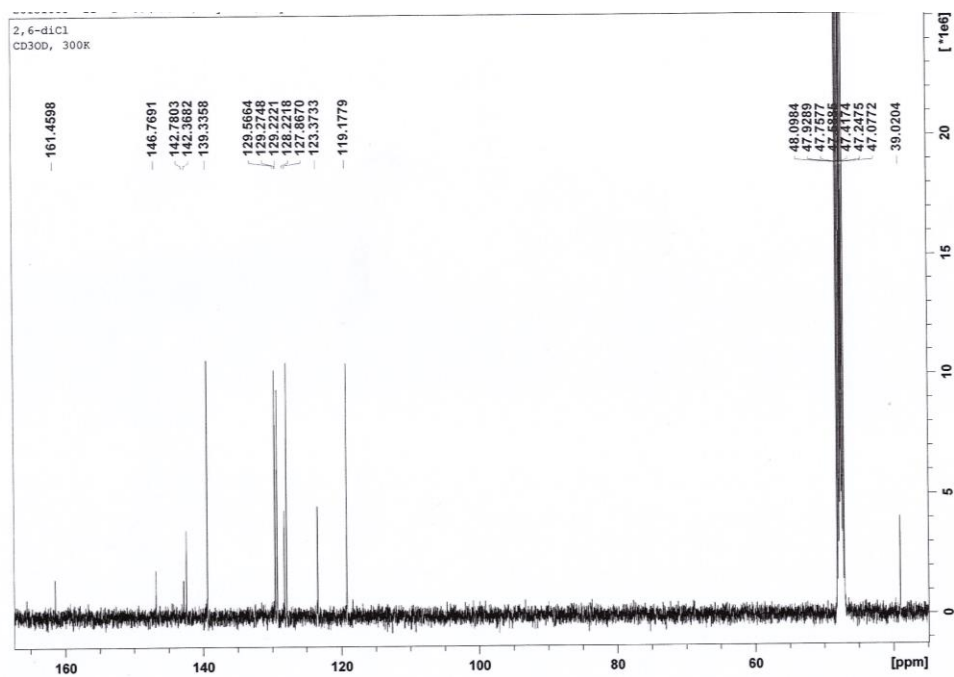





9-[(2,6-dibromophenoxy)carbonyl]-10-methylacridinium trifluoromethanesulfonate (**2,6-diBr**)

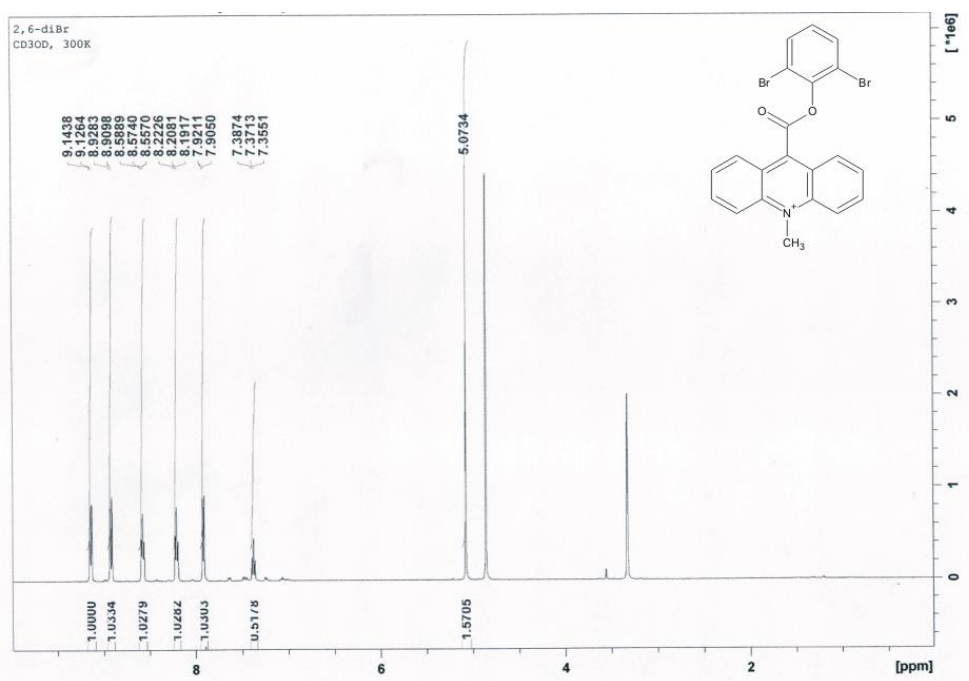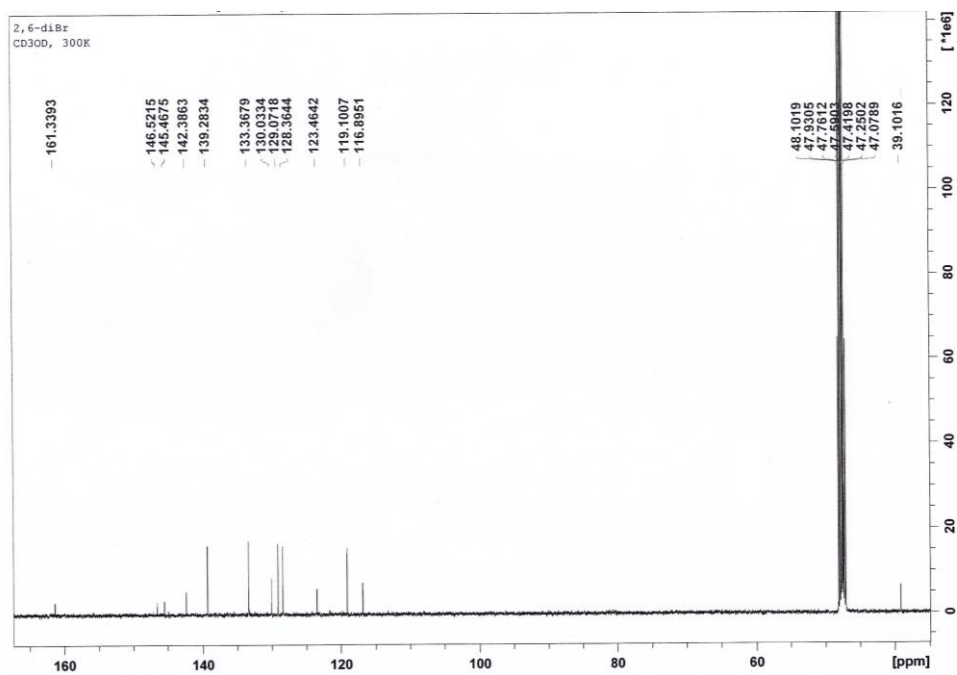

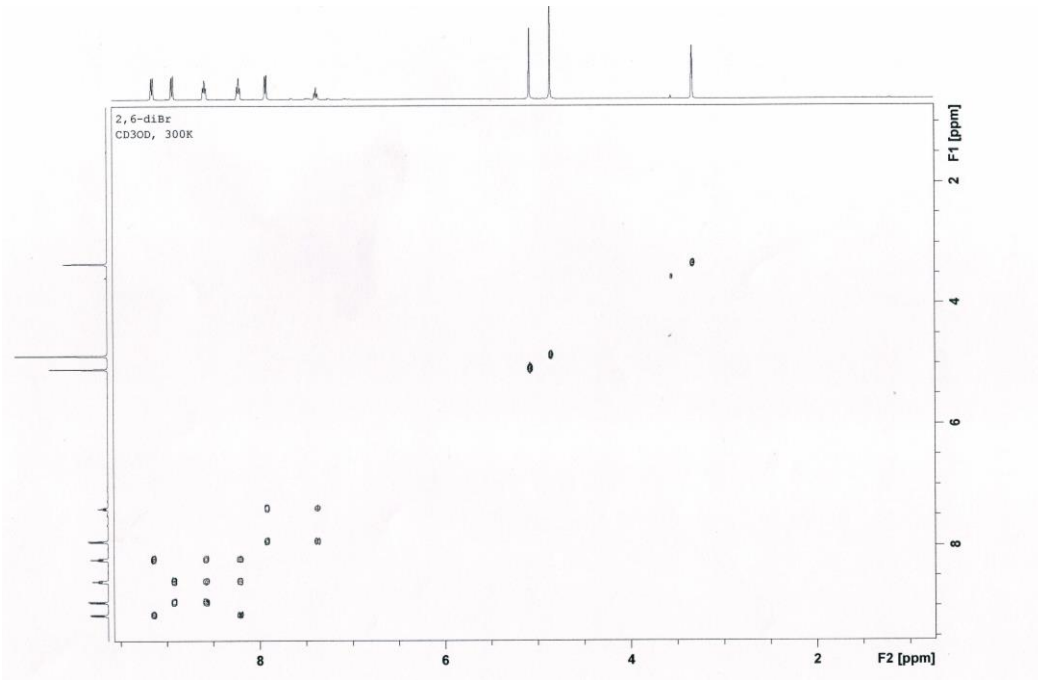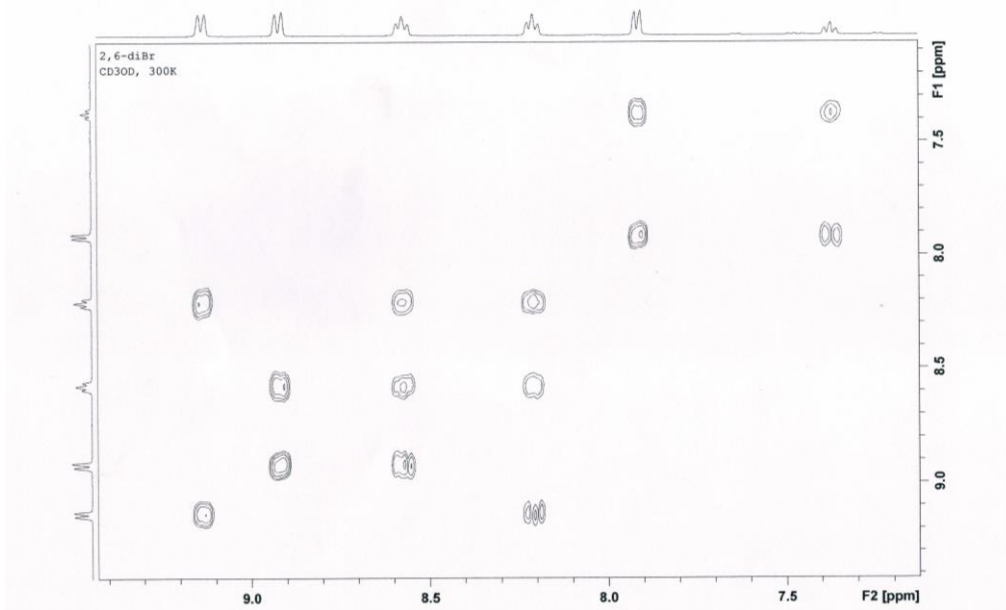



9-[(2,6-diiodophenoxy)carbonyl]-10-methylacridinium (**2,6-diI**)

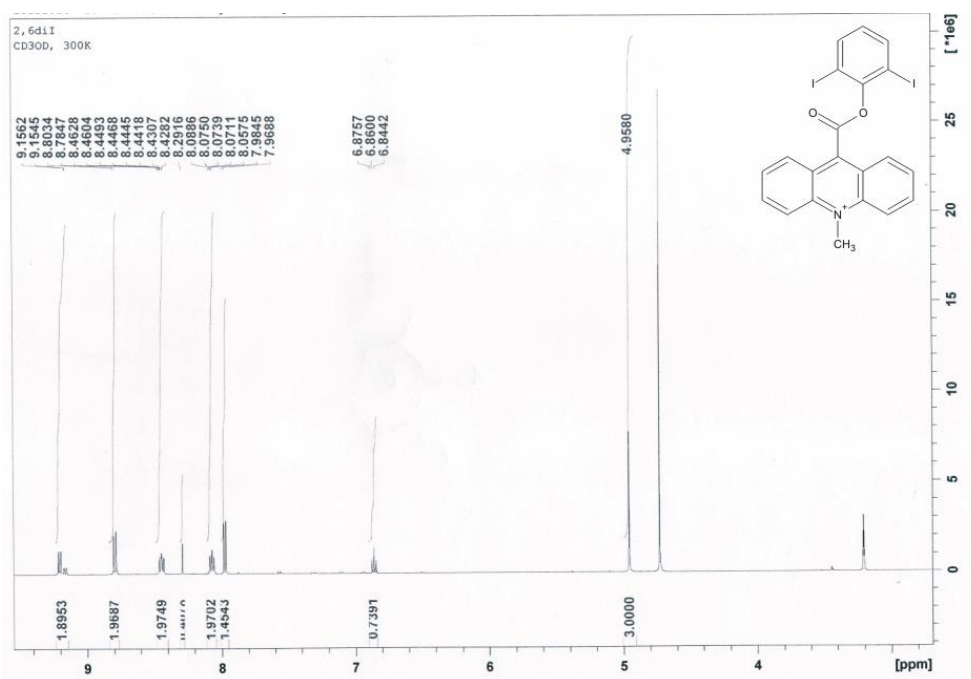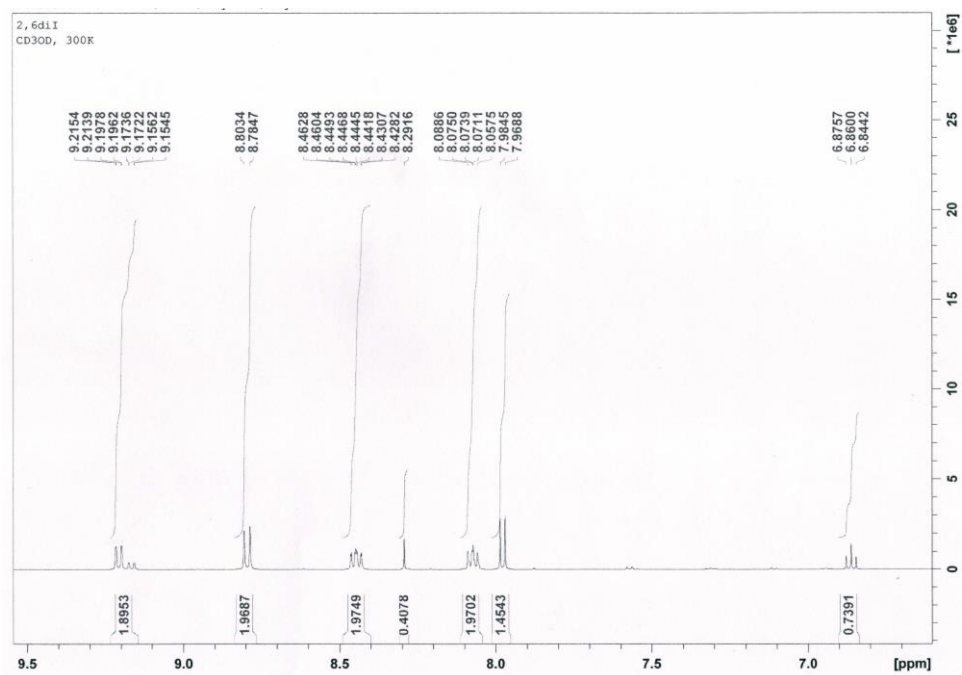

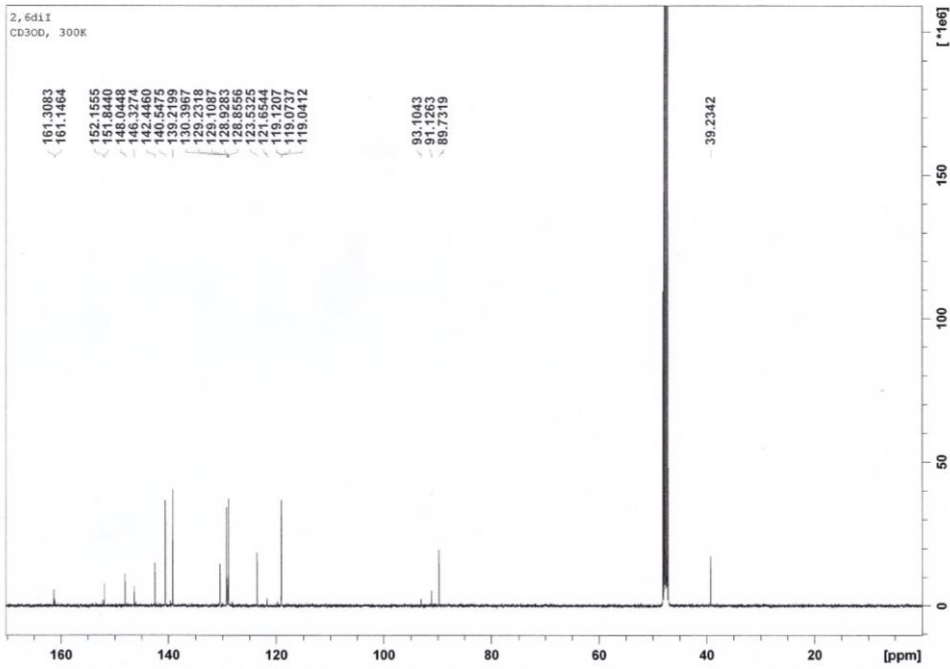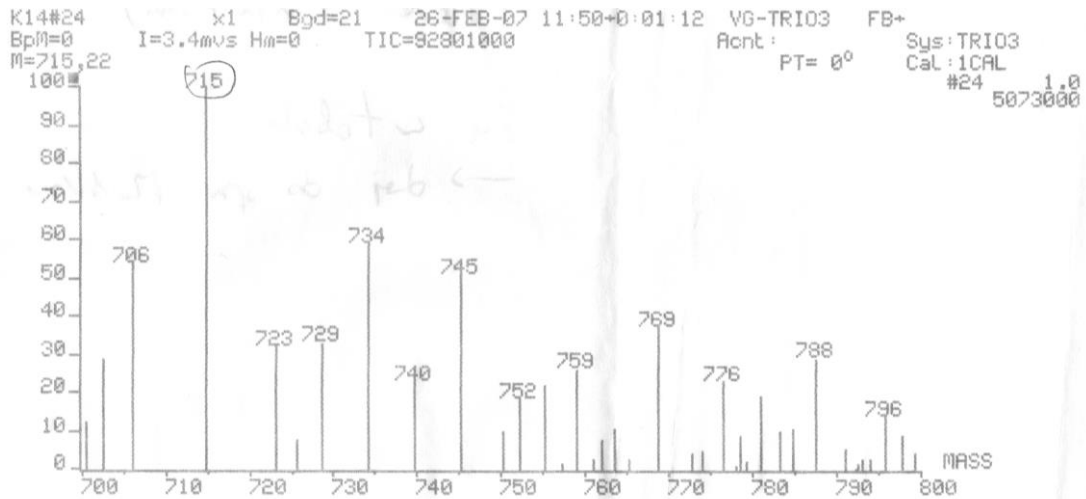

# 9-[(3-fluorophenoxy)carbonyl]-10-methylacridinium (**3-F**)

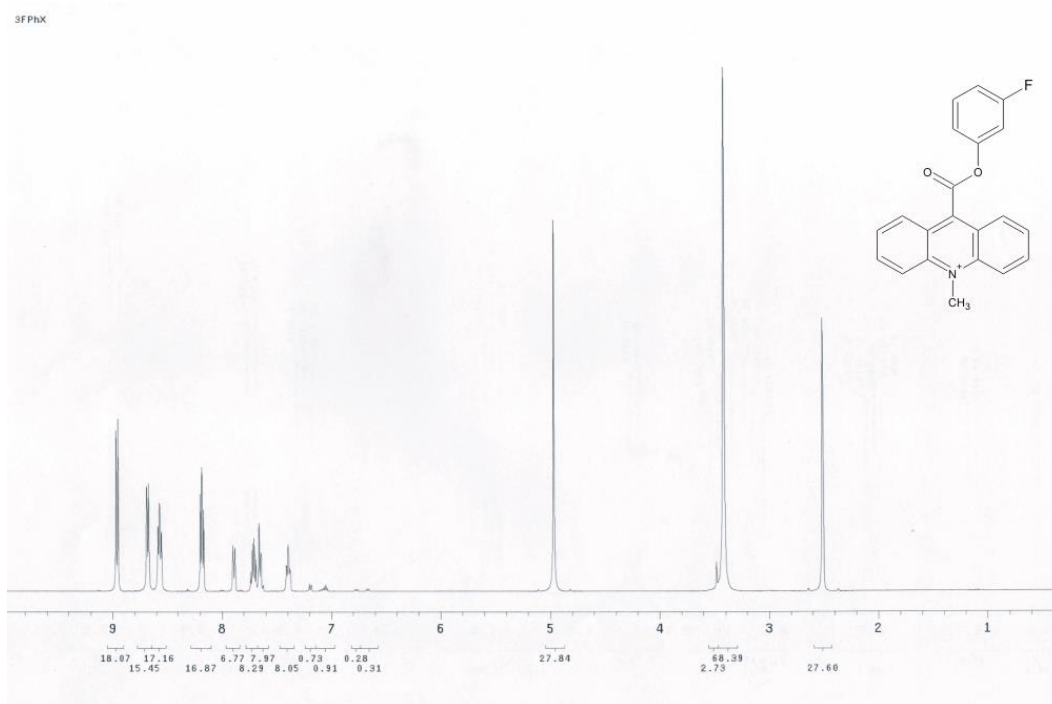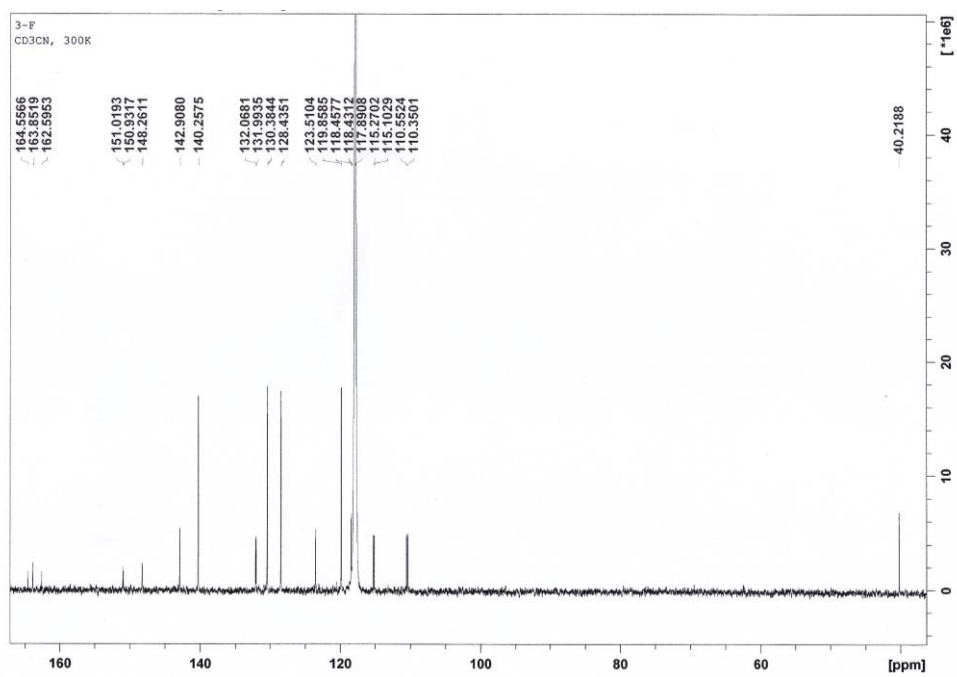

3FPHX#3 x1 Bgd=2 5-MAY-08 12:18+0:00:40 VG-TR103 FB+  
Bp/m=0 I=13mVs Hm=0 TIC=664224000 Acnt: Sys:TR103  
PT= 0° CaL:1CAL #3 1.0  
201328000

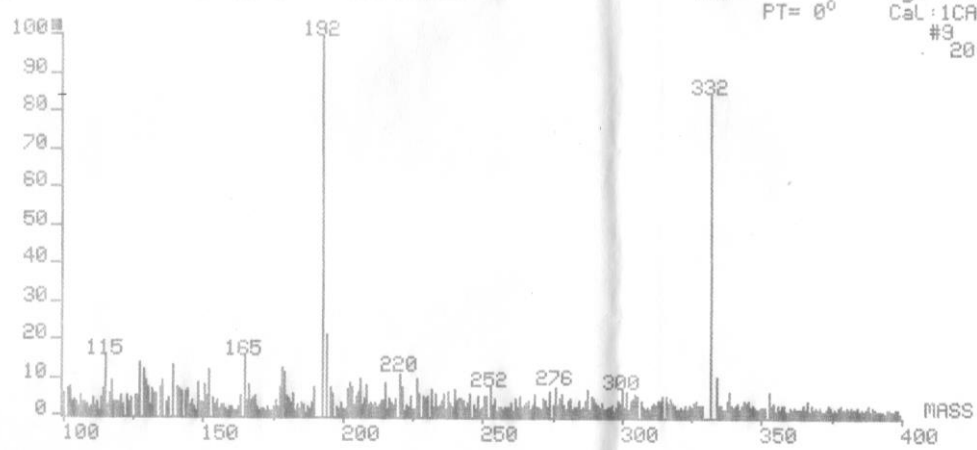



9-[(4-fluorophenoxy)carbonyl]-10-methylacridinium (**4-F**)

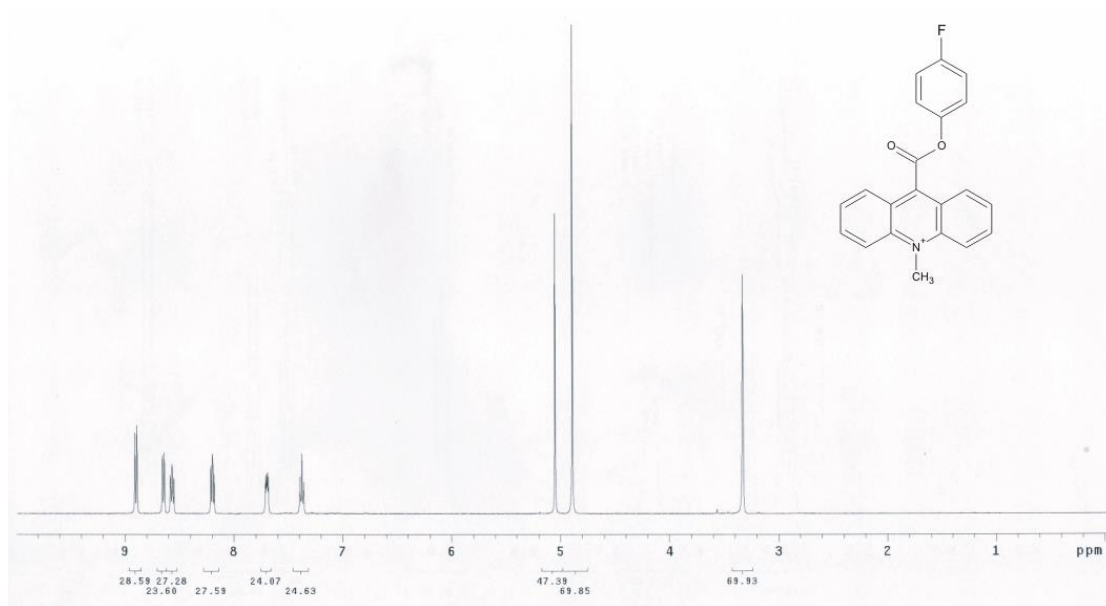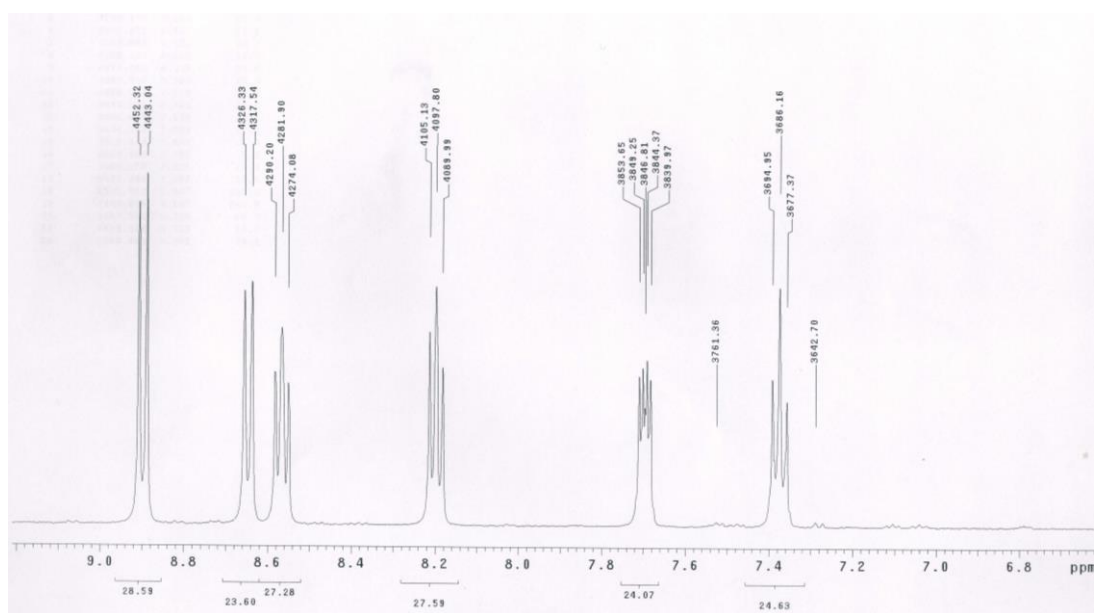

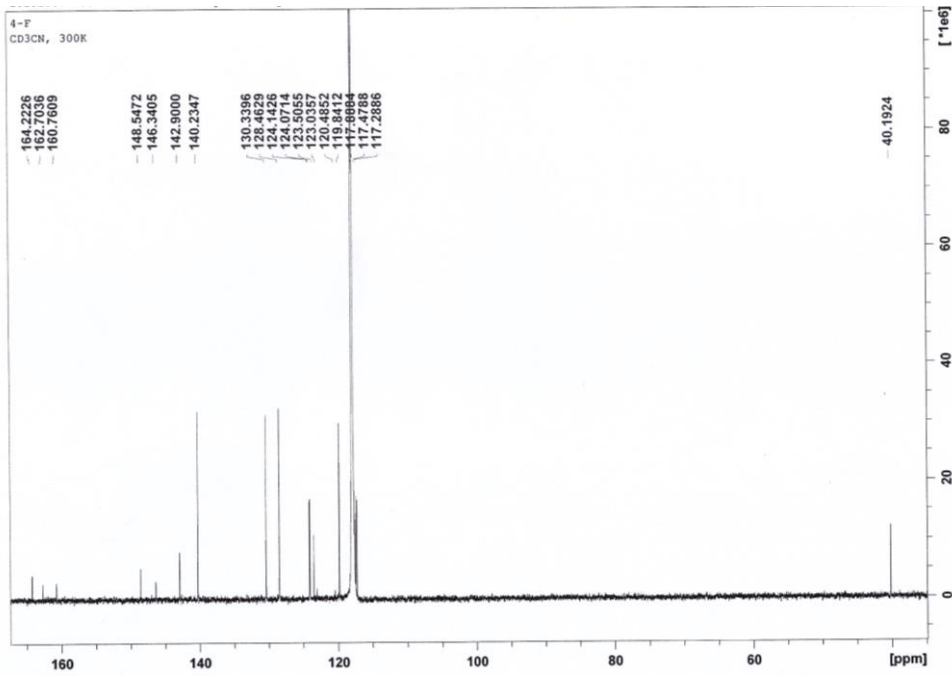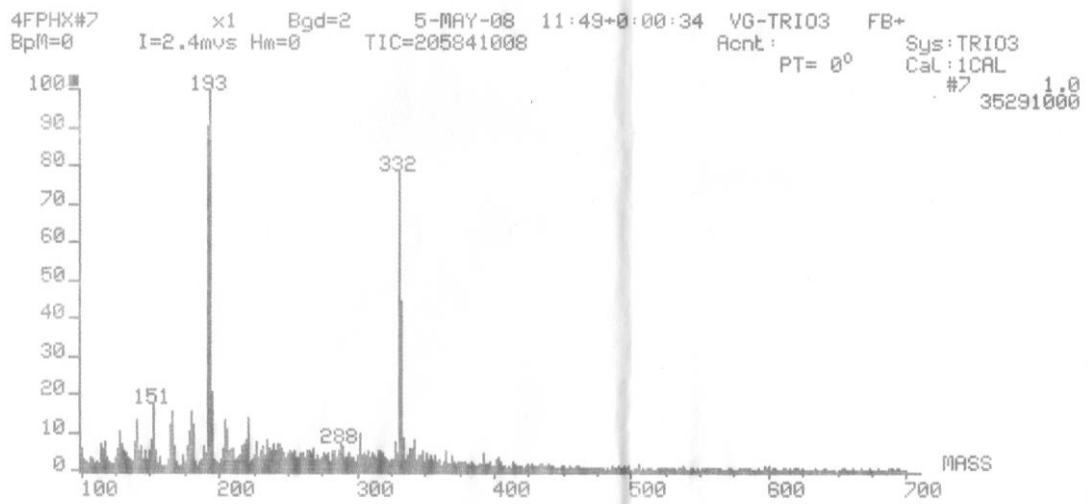

9-[(4-chlorophenoxy)carbonyl]-10-methylacridinium (**4-Cl**)

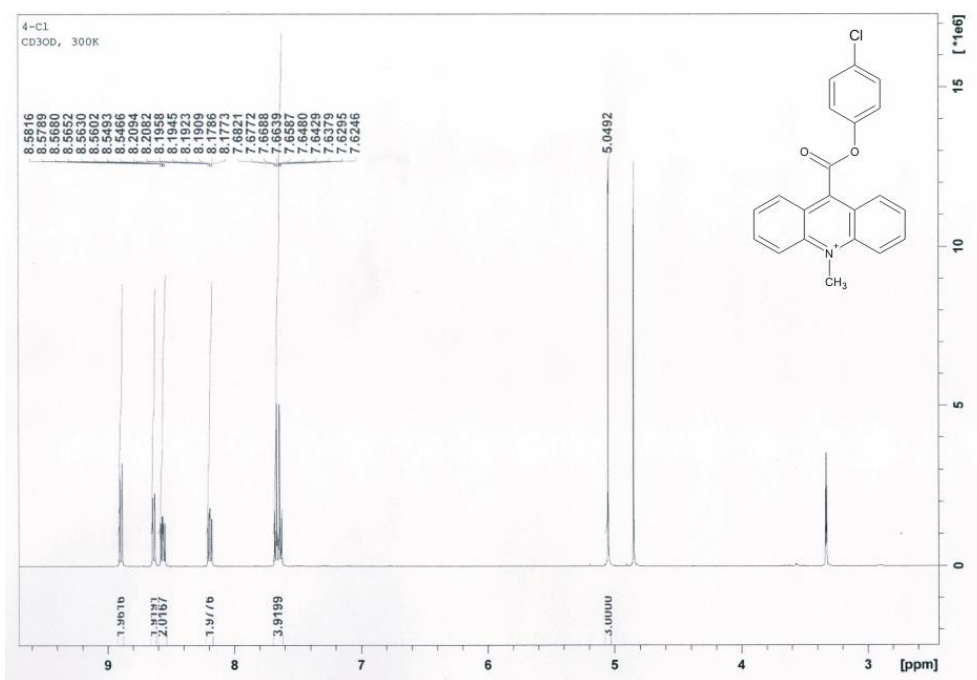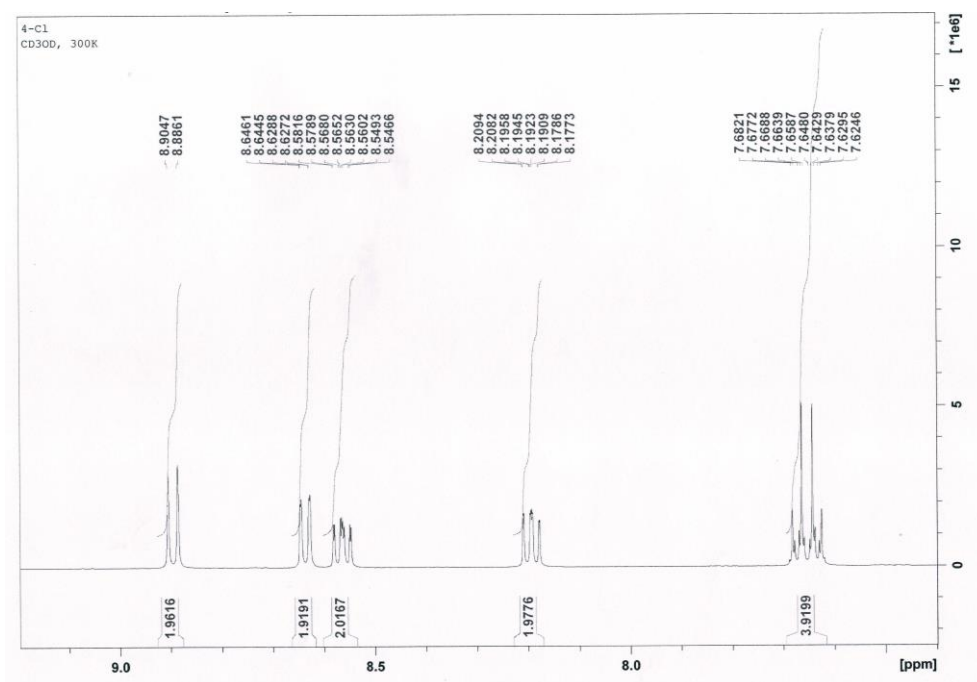

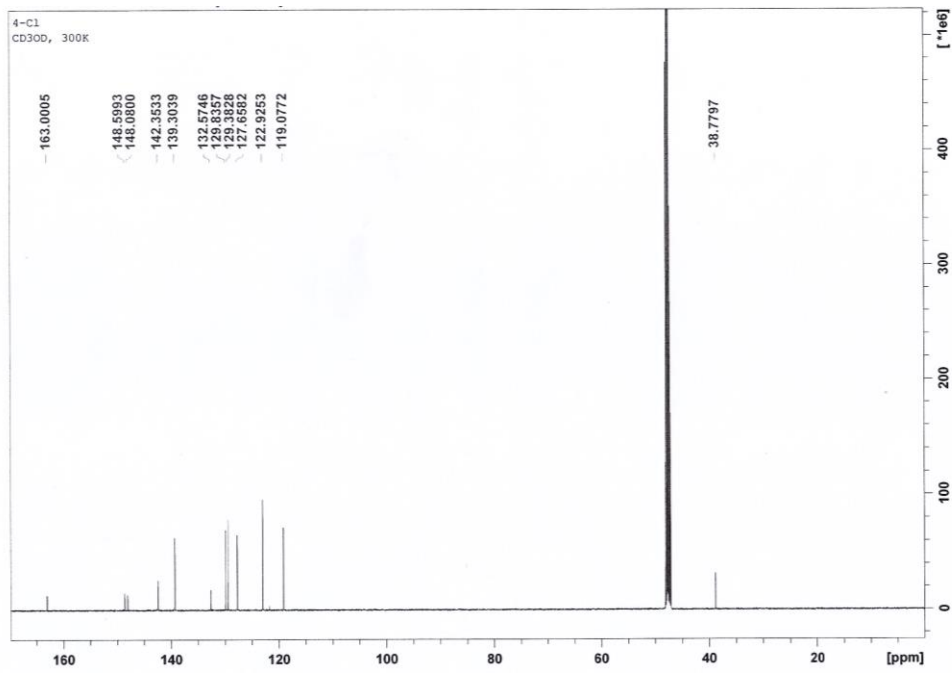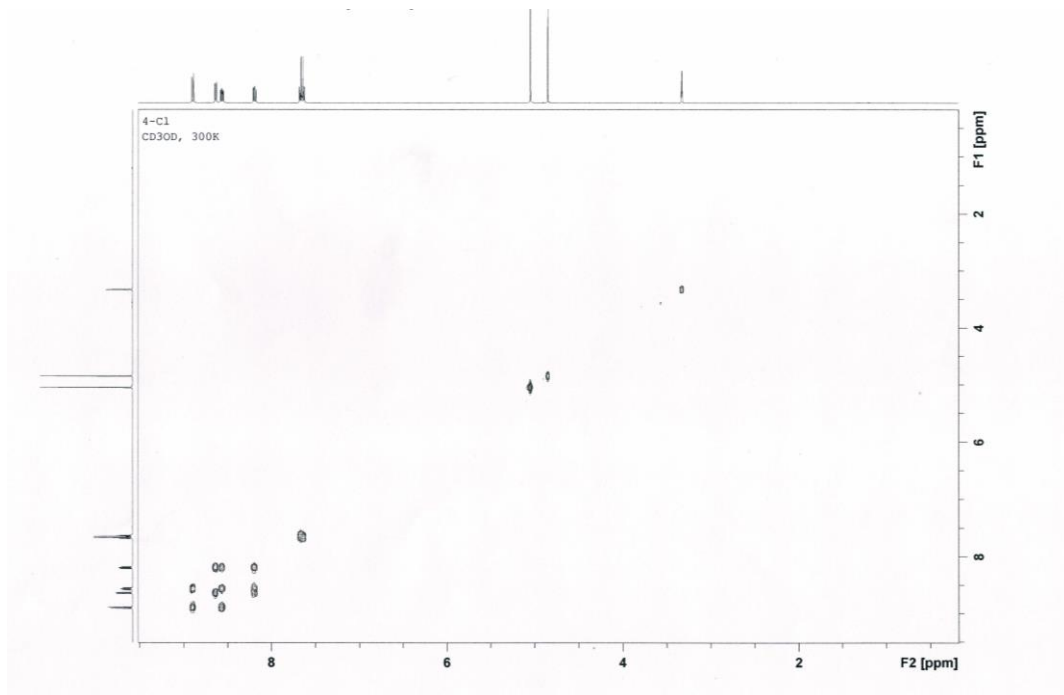

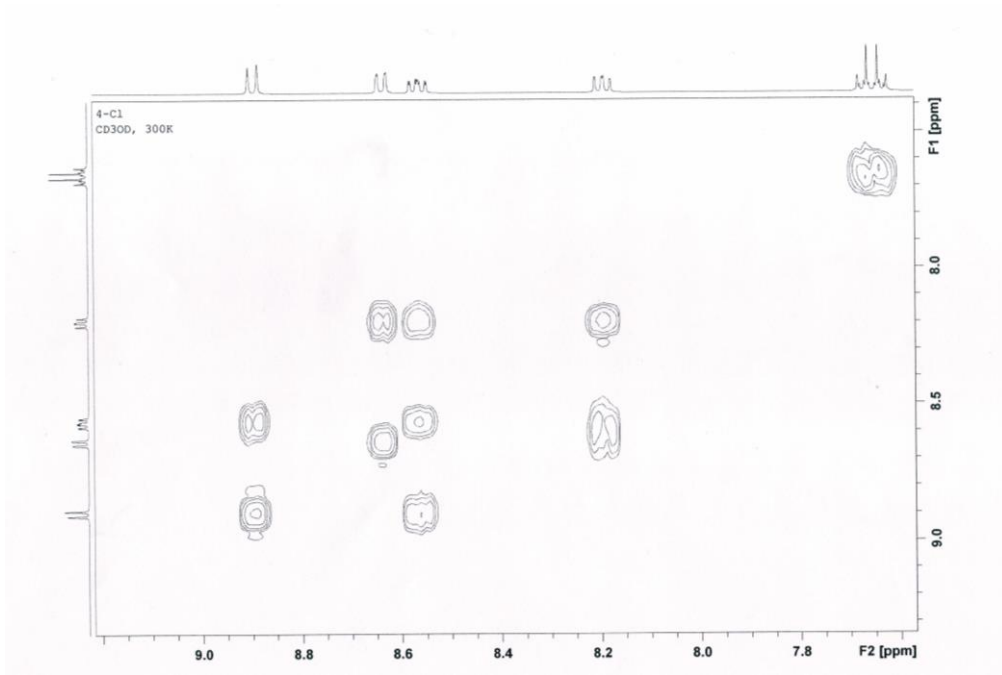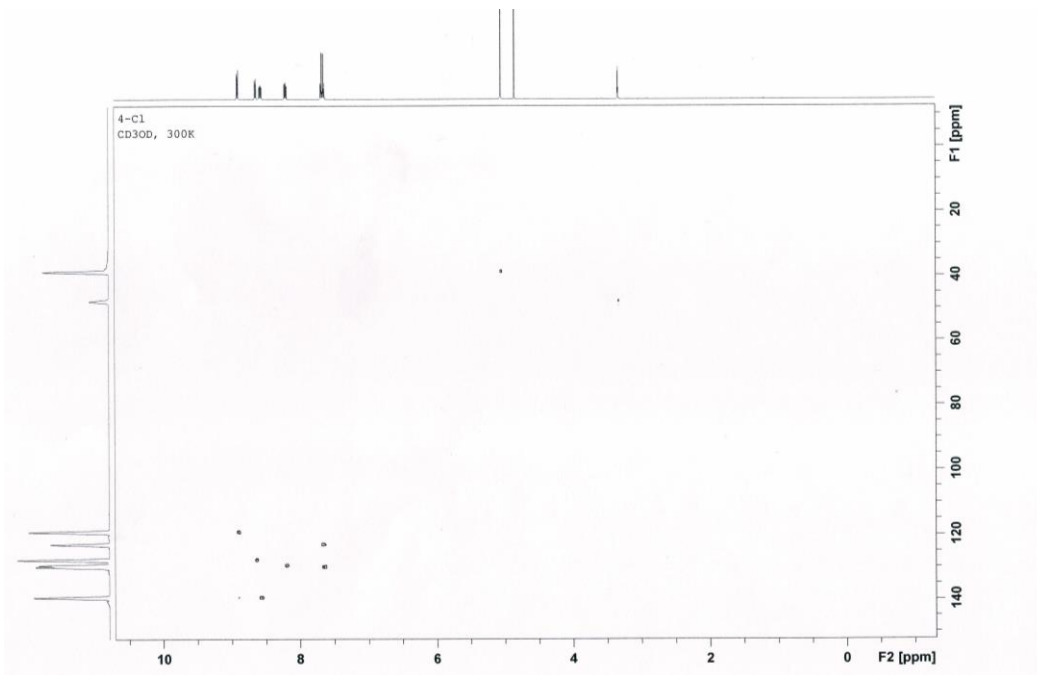

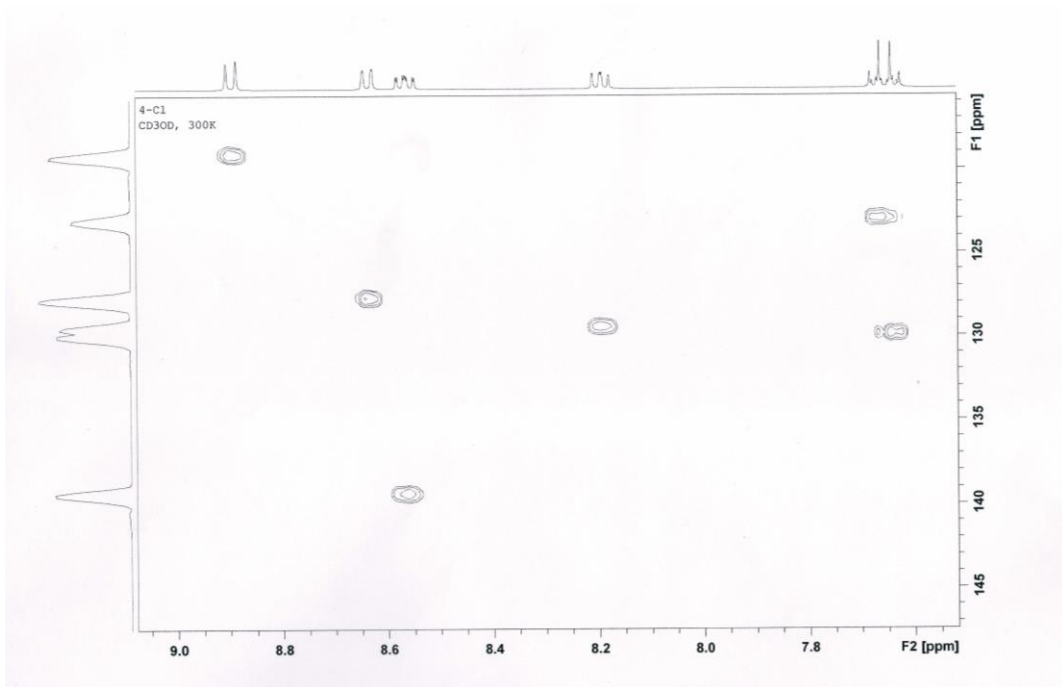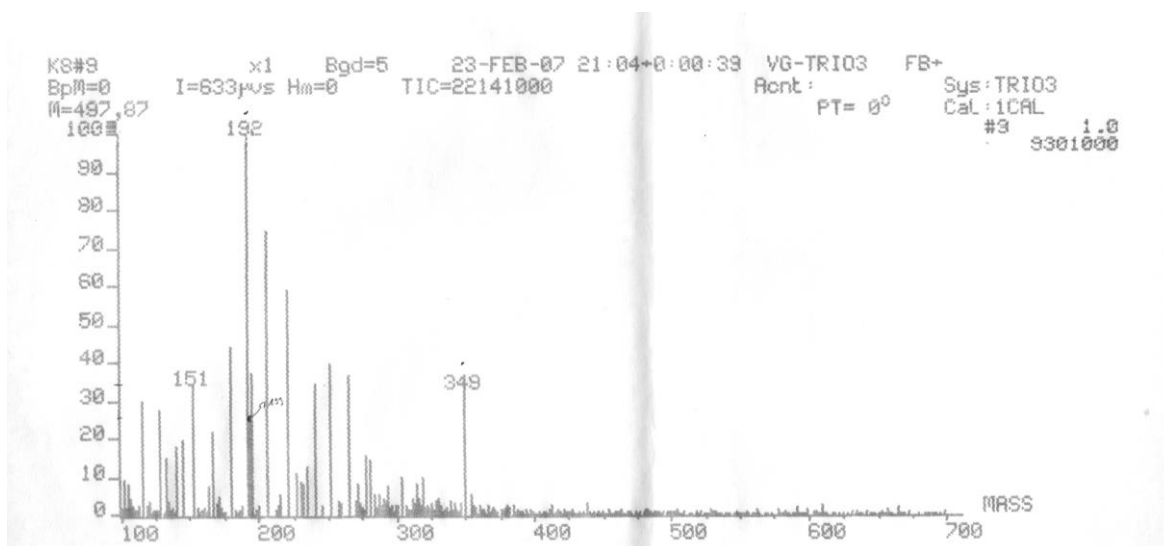

9-[(4-bromophenoxy)carbonyl]-10-methylacridinium (**4-Br**)

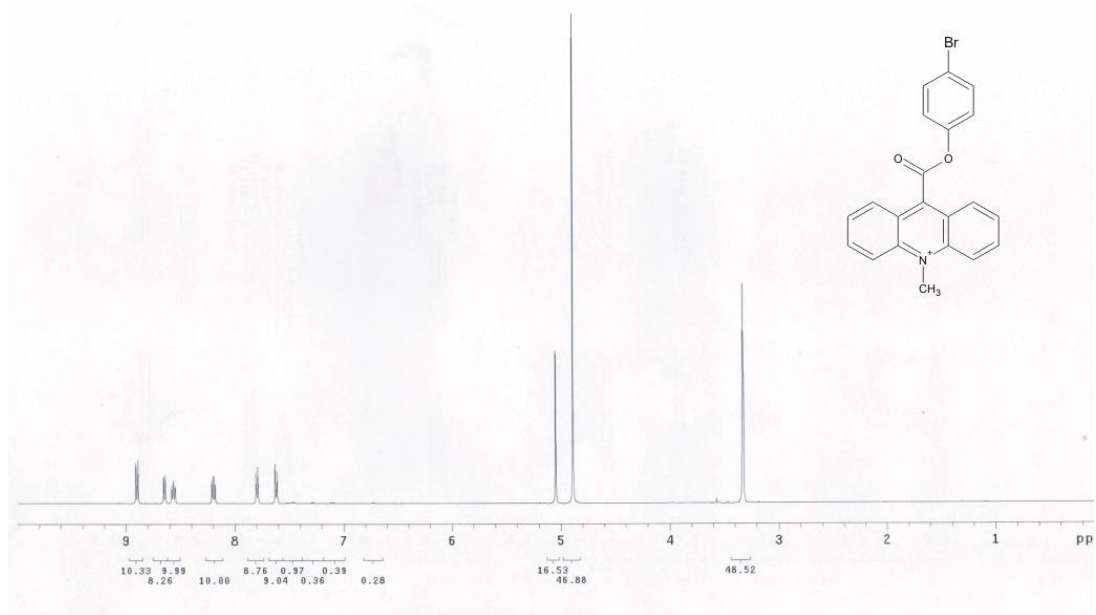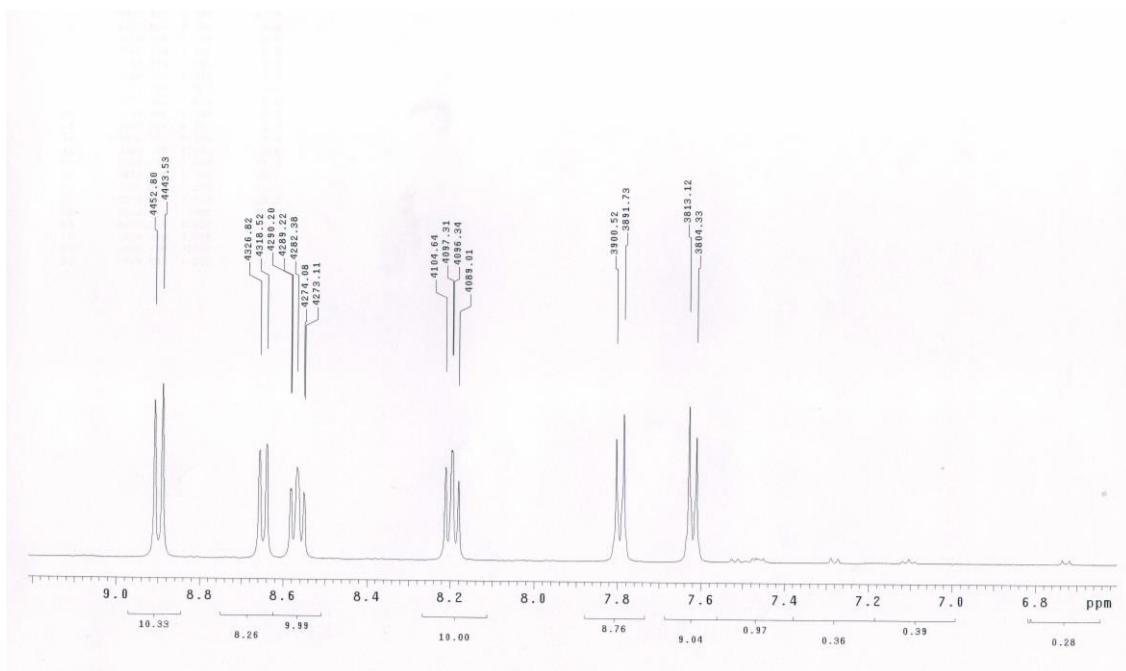

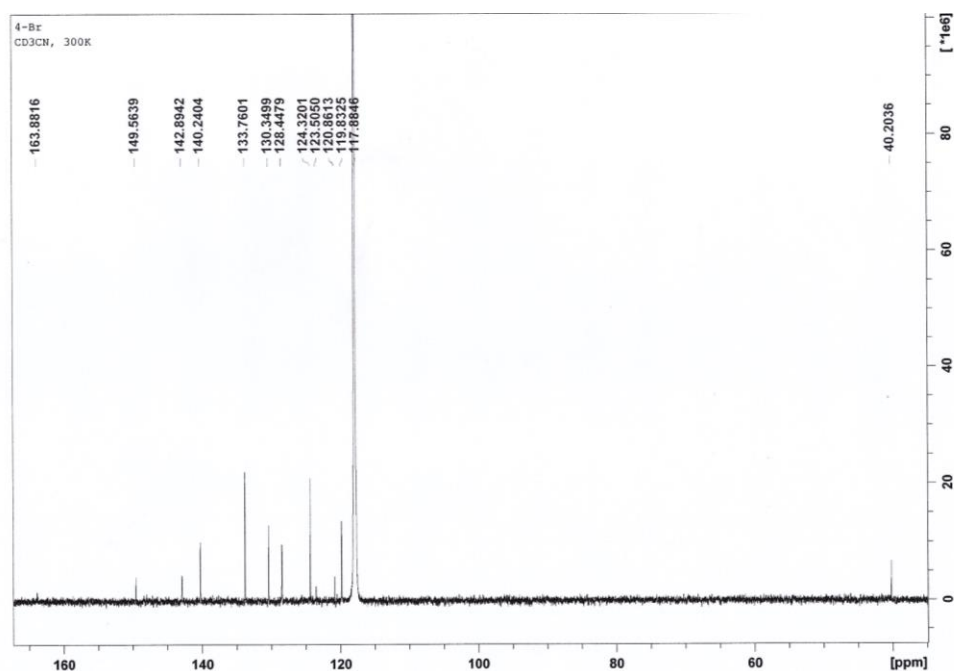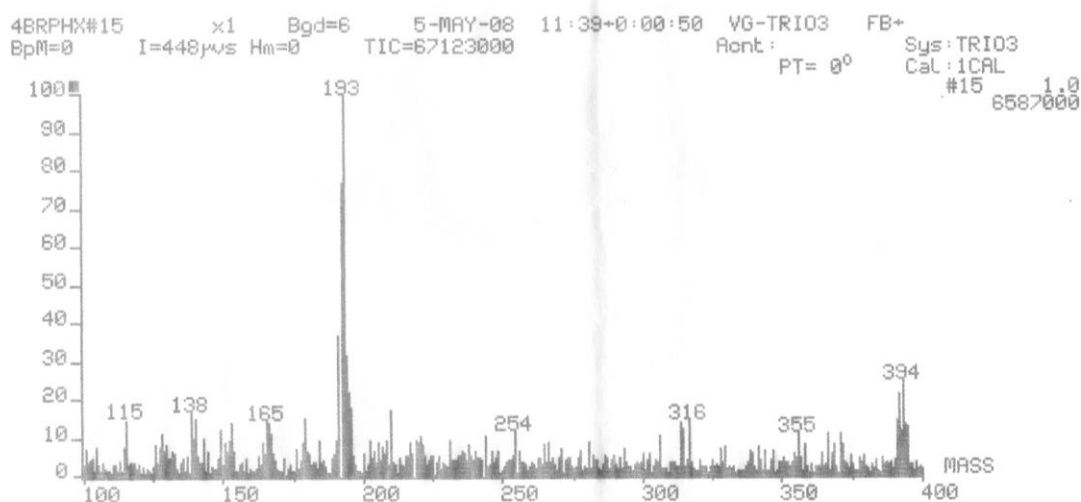

**Fig. S2**  $^1\text{H}$  NMR,  $^{13}\text{C}$  NMR,  $^1\text{H}$ - $^1\text{H}$  COSY and  $^1\text{H}$ - $^{13}\text{C}$  NMR HETCOR (HSQC) spectra (500 MHz, 100 MHz, respectively, room temperature ( $\sim 300$  K)) and MALDI-TOF MS spectra of XAE's. The aromatic region is enlarged above the general view of spectrum. For  $^1\text{H}$  NMR and MALDI-TOF MS spectra see also Table S1†; for  $^{13}\text{C}$  NMR spectra see also Table S2†. Details of experiments are described in Experimental section.



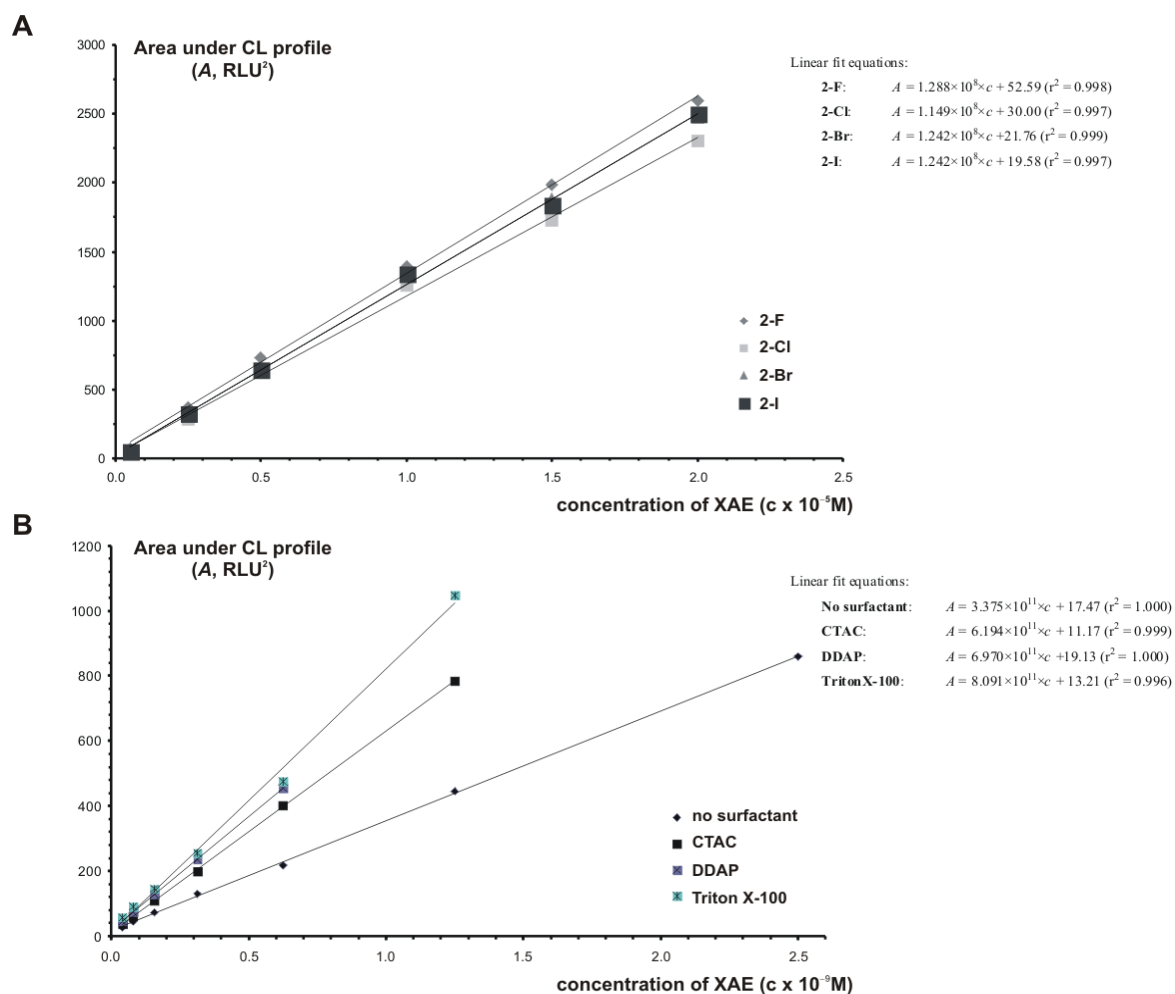

**Fig. S3** Calibration graphs for exemplary XAEs (Scheme 1) used for estimating relative CL efficiencies ( $RCLE$ ) summarized in Table S3† (graph A) and  $\Delta RCLE$ ,  $LOD$  and  $LOQ$  values given in Table 3 (graph B).  $RCLE$ s were calculated as the slopes of the above relationships ( $R^2 > 0.99$  in all cases) and normalized to the highest value. For details see Experimental section.

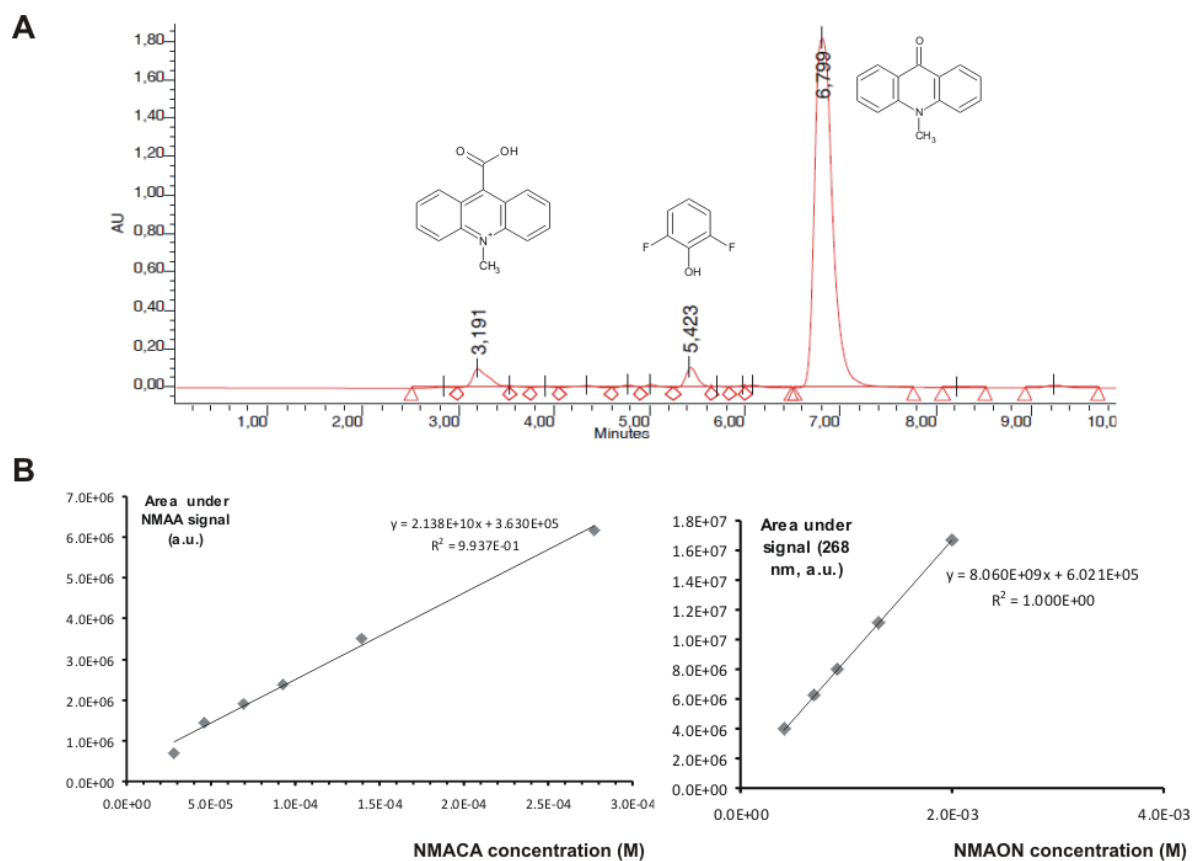

**Fig. S4** Graph A: exemplary RP-HPLC analysis for post-CL reaction mixture obtained with the participation of **2,6-diF** (Scheme 1) and standard triggering reagents (see note 1 under the Table S3†). Graph B: calibration chart for 10-methylacridinium-9-carboxylic acid (NMACA, left) and 10-methyl-9-acridinone (NMAON, right). For details see Experimental section.

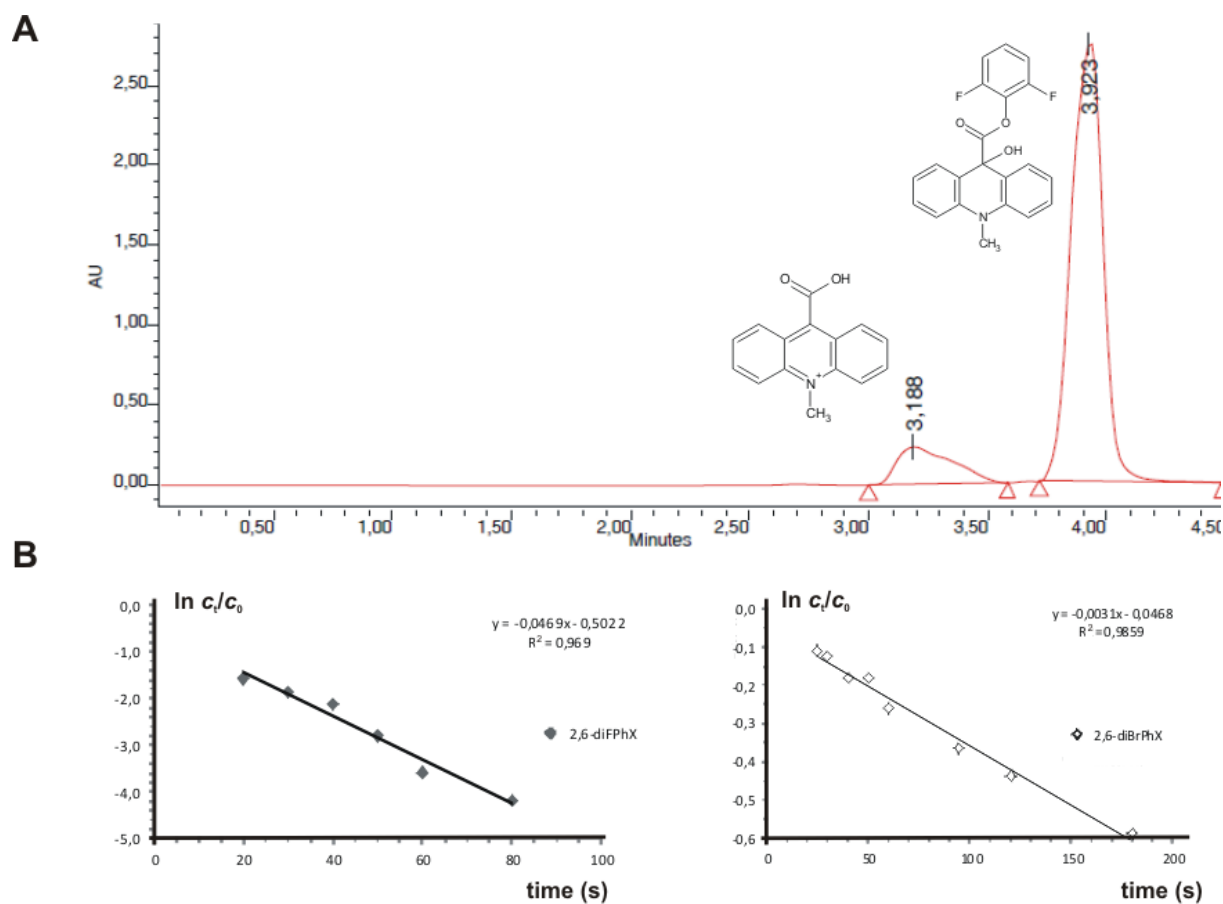

**Fig. S5** Graph A: hydrolysis of **2,6-diF** in an alkaline environment (pH = 12.0) monitored chromatographically (RP-HPLC). Graph B: Linear charts used for estimation of the pseudo-first order hydrolysis constants ( $k_{OH}$ , Table 4) for exemplary XAEs (Scheme 1): **2,6-diF** (left) and **2,6-diBr** (right). For details see Experimental section.
